# Supplementary material for: Organocatalytic asymmetric Henry reaction of isatins: Highly enantioselective synthesis of 3-hydroxy-2-oxindoles
Source: Royal Society of Chemistry journal article supplement (doi:10.1039/c1ra00477h), 2011-01-01
Supplement: c1ra00477h.pdf [file c1ra00477h.pdf]

[Supporting Information]

**Organocatalytic asymmetric Henry reaction of isatins:  
Highly enantioselective synthesis of 3-hydroxy-2-oxindoles**

**Yong Zhang, Zhi-Jun Li, Hai-Sen Xu, Yuan Zhang, and Wei Wang\***

State Key Laboratory of Applied Organic Chemistry, College of Chemistry and  
Chemical Engineering, Lanzhou University, Lanzhou, Gansu 730000, P. R. China

*Fax: + 86 931 891 5557; E-mail: wang\_wei@lzu.edu.cn*

**Note:** *This work was presented as a poster at the 5th ChemComm International Symposium (May 18, 2011, Lanzhou). When we were about to submit the manuscript, independent but very similar work from the group of Prof. Wei Wang (University of New Mexico) appeared in advance: Chem. – Eur. J., 2011, **17**, 7791 (published online on May 30, 2011; submitted on April 4, 2011). To avoid possible confusion, please note that the corresponding author of this manuscript, Prof. Wei Wang at Lanzhou University, is distinct from Prof. Wei Wang at University of New Mexico. Their native names are also of different characters.*

**Contents**

|                                                                            |     |
|----------------------------------------------------------------------------|-----|
| 1. General information                                                     | S2  |
| 2. Experimental section                                                    | S3  |
| 3. Crystal data and structure refinement for enantiopure product <b>3g</b> | S9  |
| 4. NMR spectra and HPLC chromatograms                                      | S10 |

## 1. General information

### General methods

All the reactions were carried out with dried glasswares. NMR spectra were recorded on a liquid NMR spectrometer (400 MHz for  $^1\text{H}$  and 100 MHz for  $^{13}\text{C}$ ) using  $\text{Me}_2\text{C}=\text{O}-d_6$  as the solvent. The residual proton in  $\text{Me}_2\text{C}=\text{O}-d_6$  ( $\delta = 2.05$ ) served as an internal standard for  $^1\text{H}$  NMR, and the  $^{13}\text{C}$ -atom of  $\text{Me}_2\text{C}=\text{O}-d_6$  was used as an internal standard ( $\delta = 29.9$ ) for  $^{13}\text{C}$  NMR. Chemical shifts are reported in ppm and the coupling constants  $J$  are given in Hz. The following abbreviations were used to explain the multiplicities: s (singlet), d (doublet), t (triplet), q (quartet), m (multiplet). Infrared spectra were recorded on an FT-IR spectrometer, and only major peaks were reported in  $\text{cm}^{-1}$ . HRMS and ESI data were obtained by the ESI ionization sources. Optical rotations were determined with 0.1 dm tube using 589 nm at 23 °C. Enantiomeric excess ( $ee$ ) values were determined by HPLC with chiral AD-H or OJ-H column and the detection was done by UV detector at 254 nm. Purification of the products was performed by column chromatography on silica gel (200–300 mesh).

### Materials

Catalysts QD was purchased from Aldrich company and used without further purification. C6'-OH cinchona alkaloid catalysts (Q-1a to Q-1d and QD-1a to QD-1d) were prepared according to the literature procedures.<sup>1</sup> Catalysts Q-1e<sup>2</sup> and QD-2<sup>3</sup> were also prepared according to the literature procedures, respectively. Isatins were commercially available. The *N*-methyl or *N*-benzyl protected isatins were prepared according to the literature method.<sup>4</sup> All solvents were purified according to the standard procedures.

1. (a) H. Li, Y. Wang, L. Tang and L. Deng, *J. Am. Chem. Soc.*, 2004, **126**, 9906; (b) H. Li, Y. Wang, L. Tang, F. Wu, X. Liu, C. Guo, B. M. Foxman and L. Deng, *Angew. Chem., Int. Ed.*, 2005, **44**, 105.
2. M. Bandini, R. Sinisi and A. Umani-Ronchi, *Chem. Commun.*, 2008, 4360.
3. B. Vakulya, S. Varga, A. Csámpai and T. Soós, *Org. Lett.*, 2005, **7**, 1967
4. L. E. Overman and E. A. Peterson, *Tetrahedron*, 2003, **59**, 6905.

## 2. Experimental section

### 2.1 General procedure for catalytic asymmetric Henry reaction of isatins

To a flame-dried test tube was added isatin **1** (0.1 mmol) and catalyst **Q-1e** (10 mol%), followed by anhydrous THF (1 mL). The reaction mixture was stirred at 5 °C under argon for 10 minutes. Nitromethane **2** (1.0 mmol, 10.0 equiv., 54  $\mu$ L) was then added through a syringe in one portion. The resulting mixture was stirred at 5 °C for the indicated time. After the reaction was completed, the reaction mixture was directly subjected to silica gel flash chromatography using PE/acetone (v/v = 4/1 to 2/1) as eluent to afford the desired product **3** with the yield and enantiomeric excess showed in the main text. (**Cautions:** The product **3** could be racemized under heat or in protic solvent. When the product **3** was concentrated, the temperature should not exceed 30 °C ).

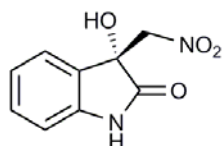

**(R)-3-hydroxy-3-(nitromethyl)indolin-2-one (3a):** 96% yield;  $[\alpha]_D^{23} = -64$  (*c* 0.9, THF); 92% ee, determined by HPLC analysis using Daicel chiral AD-H column, Hexane/*i*-PrOH = 85:15. Flow rate: 1.0 mL/min, detection at 254 nm, *t* (major) = 10.85 min, *t* (minor) = 15.14 min; **IR:**  $\nu$  3315 1725 1621 1554 1473 1379 1190 1121 755 664  $\text{cm}^{-1}$ ;  **$^1\text{H}$  NMR** (400 MHz,  $\text{Me}_2\text{C}=\text{O}-d_6$ )  $\delta$  (ppm) 9.58 (s, 1H, NH), 7.49 (d, *J* = 7.6 Hz, 1H), 7.31 (td, *J* = 7.6 Hz, 1.2 Hz, 1H), 7.04 (td, *J* = 7.6 Hz, 1.2 Hz, 1H), 6.95 (d, *J* = 7.6 Hz, 1H), 5.71 (s, 1H, OH), 5.09 (d, *J* = 12.8 Hz, 1H), 5.05 (d, *J* = 12.8 Hz, 1H);  **$^{13}\text{C}$  NMR** (100 MHz,  $\text{Me}_2\text{C}=\text{O}-d_6$ )  $\delta$  (ppm) 176.5, 143.7, 131.5, 128.6, 125.7, 123.1, 111.2, 79.3, 74.1.

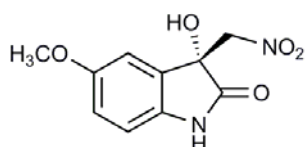

**(R)-3-hydroxy-5-methoxy-3-(nitromethyl)indolin-2-one (3b):** 96% yield;  $[\alpha]_D^{23} = -35$  (*c* 1.0, THF); 92% ee, determined by HPLC analysis using Daicel chiral AD-H column, Hexane/*i*-PrOH = 85:15. Flow rate: 1.0 mL/min, detection at 254 nm, *t* (major) = 15.25 min, *t* (minor) = 22.73 min; **IR:**  $\nu$  3398 3261 1734 1620 1553 1480 1425 1378 1228 1185 1090 887 829 739 665  $\text{cm}^{-1}$ ;  **$^1\text{H}$  NMR** (400 MHz,  $\text{Me}_2\text{C}=\text{O}-d_6$ )

$\delta$  (ppm) 9.43 (s, 1H), 7.16 (t,  $J = 1.2$  Hz, 1H), 6.87 (d,  $J = 1.5$  Hz, 2H), 5.71 (s, 1H), 5.07 (s, 2H), 3.76 (s, 3H).  $^{13}\text{C}$  NMR (100 MHz,  $\text{Me}_2\text{C}=\text{O}-d_6$ )  $\delta$  (ppm) 176.5, 156.8, 136.7, 129.7, 116.1, 112.6, 111.7, 79.2, 74.4, 56.1. **ESI-HRMS**: calcd. for  $[\text{C}_{10}\text{H}_{10}\text{N}_2\text{O}_5 + \text{NH}_4]$  256.0928, found 256.0931.

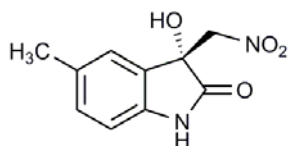

**(R)-3-hydroxy-5-methyl-3-(nitromethyl)indolin-2-one (3c)**: 95% yield;  $[\alpha]_{\text{D}}^{23} = -28$  ( $c$  1.0, THF); 92% ee, determined by HPLC analysis using Daicel chiral AD-H column, Hexane/*i*-PrOH = 85:15. Flow rate: 1.0 mL/min, detection at 254 nm,  $t$  (major) = 10.64 min,  $t$  (minor) = 15.49 min; **IR**:  $\nu$  3324 3267 1752 1731 1626 1556 1495 1424 1380 1307 1202 1162 1072 1044 831 799 666 593  $\text{cm}^{-1}$ ;  $^1\text{H}$  NMR (400 MHz,  $\text{Me}_2\text{C}=\text{O}-d_6$ )  $\delta$  (ppm) 9.48 (s, 1H), 7.31 (s, 1H), 7.12 (dd,  $J = 7.9, 0.9$  Hz, 1H), 6.84 (d,  $J = 7.9$  Hz, 1H), 5.65 (s, 1H), 5.07 (d,  $J = 12.9$  Hz, 1H), 5.02 (d,  $J = 12.9$  Hz, 1H), 2.29 (s, 3H).  $^{13}\text{C}$  NMR (100 MHz,  $\text{Me}_2\text{C}=\text{O}-d_6$ )  $\delta$  (ppm) 176.5, 141.2, 132.5, 131.7, 128.6, 126.3, 110.9, 79.2, 74.1, 21.1. **ESI-HRMS**: calcd. for  $[\text{C}_{10}\text{H}_{10}\text{N}_2\text{O}_4 + \text{NH}_4]$  240.0979, found 240.0980.

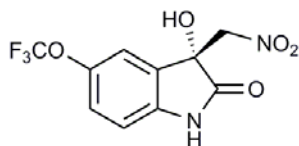

**(R)-3-hydroxy-5-(trifluoromethoxy)-3-(nitromethyl) indolin-2-one (3d)**: 97% yield;  $[\alpha]_{\text{D}}^{23} = -29$  ( $c$  1.0, THF); 87% ee, determined by HPLC analysis using Daicel chiral AD-H column, Hexane/*i*-PrOH = 85:15. Flow rate: 1.0 mL/min, detection at 254 nm,  $t$  (major) = 6.79 min,  $t$  (minor) = 10.70 min; **IR**:  $\nu$  3305 1739 1631 1559 1488 1422 1379 1266 1220 1190 1168 888 833 741 667  $\text{cm}^{-1}$ ;  $^1\text{H}$  NMR (400 MHz,  $\text{Me}_2\text{C}=\text{O}-d_6$ )  $\delta$  (ppm) 9.80 (s, 1H), 7.55 (d,  $J = 1.4$  Hz, 1H), 7.31 (dd,  $J = 8.5, 1.6$  Hz, 1H), 7.07 (d,  $J = 8.5$  Hz, 1H), 5.99 (s, 1H), 5.18 (d,  $J = 13.3$  Hz, 1H), 5.13 (d,  $J = 13.3$  Hz, 1H).  $^{13}\text{C}$  NMR (100 MHz,  $\text{Me}_2\text{C}=\text{O}-d_6$ )  $\delta$  (ppm) 176.4, 145.0, 142.9 130.3, 124.8 121.6 (q,  $^1J_{\text{CF}} = 254$  Hz), 119.9, 112.1, 78.8, 74.1. **ESI-HRMS**: calcd. for  $[\text{C}_{10}\text{H}_{10}\text{N}_2\text{O}_4 + \text{NH}_4]$  310.0645, found 310.0642.

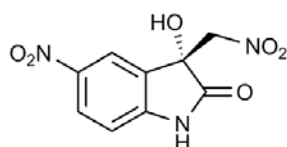

**(R)-3-hydroxy-5-nitro-3-(nitromethyl)indolin-2-one (3e):** 97% yield;  $[\alpha]_{\text{D}}^{23} = -41$  ( $c$  1.0, THF); 84% ee, determined by HPLC analysis using Daicel chiral AD-H column, Hexane/*i*-PrOH = 85:15. Flow rate: 1.0 mL/min, detection at 254 nm,  $t$  (major) = 12.36 min,  $t$  (minor) = 16.84 min; **IR:**  $\nu$  3314 1746 1690 1626 1558 1527 1481 1380 1342 1259 1189 1113 1086 912 842 748 662  $\text{cm}^{-1}$ ;  **$^1\text{H}$  NMR** (400 MHz,  $\text{Me}_2\text{C}=\text{O}-d_6$ )  $\delta$  (ppm) 10.26 (s, 1H), 8.47 (d,  $J = 2.2$  Hz, 1H), 8.31 (dd,  $J = 8.7, 2.2$  Hz, 1H), 7.21 (d,  $J = 8.7$  Hz, 1H), 6.16 (s, 1H), 5.37 (d,  $J = 13.8$  Hz, 1H), 5.22 (d,  $J = 13.8$  Hz, 1H).  **$^{13}\text{C}$  NMR** (100 MHz,  $\text{Me}_2\text{C}=\text{O}-d_6$ )  $\delta$  (ppm) 176.6, 149.9, 144.1, 129.8, 128.4, 121.7, 111.4, 78.3, 73.5. **ESI-HRMS:** calcd. for  $[\text{C}_9\text{H}_7\text{N}_3\text{O}_6 + \text{NH}_4]$  271.0673, found 271.0668.

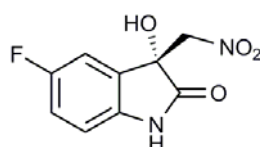

**(R)-5-fluoro-3-hydroxy-3-(nitromethyl)indolin-2-one (3f):** 97% yield;  $[\alpha]_{\text{D}}^{23} = -52$  ( $c$  1.0, THF); 91% ee, determined by HPLC analysis using Daicel chiral AD-H column, Hexane/*i*-PrOH = 85:15. Flow rate: 1.0 mL/min, detection at 254 nm,  $t$  (major) = 10.19 min,  $t$  (minor) = 13.24 min; **IR:**  $\nu$  3290 1729 1631 1556 1488 1421 1379 1271 1190 1068 824  $\text{cm}^{-1}$ ;  **$^1\text{H}$  NMR** (400 MHz,  $\text{Me}_2\text{C}=\text{O}-d_6$ )  $\delta$  (ppm) 9.63 (s, 1H), 7.36 (dd,  $J = 8.1, 2.6$  Hz, 1H), 7.10 (td,  $J = 9.1, 2.6$  Hz, 1H), 6.97 (dd,  $J = 8.5, 4.3$  Hz, 1H), 5.89 (s, 1H), 5.11 (s, 2H).  **$^{13}\text{C}$  NMR** (100 MHz,  $\text{Me}_2\text{C}=\text{O}-d_6$ )  $\delta$  (ppm) 176.4, 159.7 (d,  $^1J_{\text{CF}} = 237$  Hz), 139.9, 130.3 (d,  $^3J_{\text{CF}} = 8$  Hz), 117.7 (d,  $^2J_{\text{CF}} = 24$  Hz), 113.6 (d,  $^2J_{\text{CF}} = 24$  Hz), 112.1 (d,  $^3J_{\text{CF}} = 8$  Hz), 79.0, 74.2. **ESI-HRMS:** calcd. for  $[\text{C}_9\text{H}_7\text{FN}_2\text{O}_4 + \text{NH}_4]$  244.0728, found 244.0731.

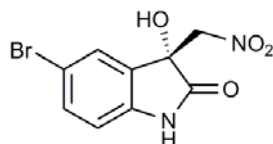

**(R)-5-bromo-3-hydroxy-3-(nitromethyl)indolin-2-one (3g):** 96% yield;  $[\alpha]_{\text{D}}^{23} = -44$  ( $c$  1.0, THF); 86% ee, determined by HPLC analysis using Daicel chiral AD-H column, Hexane/*i*-PrOH = 85:15. Flow rate: 1.0 mL/min, detection at 254 nm,  $t$  (major) = 9.76 min,  $t$  (minor) = 14.25 min; **IR:**  $\nu$  3287 1734 1616 1554 1473 1441 1378 1308 1187 1066 822  $\text{cm}^{-1}$ ;  **$^1\text{H}$  NMR** (400 MHz,  $\text{Me}_2\text{C}=\text{O}-d_6$ )  $\delta$  (ppm) 9.74 (s,

1H), 7.70 (d,  $J = 1.8$  Hz, 1H), 7.49 (dd,  $J = 8.3, 2.0$  Hz, 1H), 6.94 (d,  $J = 8.3$  Hz, 1H), 5.90 (s, 1H), 5.16 (d,  $J = 13.4$  Hz, 1H), 5.11 (d,  $J = 13.4$  Hz, 1H).  **$^{13}\text{C}$  NMR** (100 MHz,  $\text{Me}_2\text{C}=\text{O}-d_6$ )  $\delta$  (ppm) 176.0, 143.1, 134.2, 131.1, 128.9, 115.0, 113.1, 78.7, 73.9. **ESI-HRMS**: calcd. for  $[\text{C}_9\text{H}_7\text{BrN}_2\text{O}_4 + \text{NH}_4]$  303.9927, found 303.9934 and 305.9903.

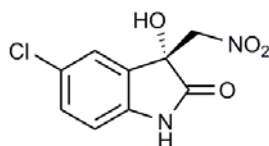

**(R)-5-chloro-3-hydroxy-3-(nitromethyl)indolin-2-one (3h)**: 96% yield;  $[\alpha]_{\text{D}}^{23} = -26$  ( $c$  1.0, THF); 90% ee, determined by HPLC analysis using Daicel chiral AD-H column, Hexane/*i*-PrOH = 85:15. Flow rate: 1.0 mL/min, detection at 254 nm,  $t$  (major) = 9.58 min,  $t$  (minor) = 14.13 min; **IR**:  $\nu$  3311 3231 1724 1689 1613 1556 1496 1474 1434 1380 1317 1201 1170 1086 1023 832 773 666  $\text{cm}^{-1}$ ;  **$^1\text{H}$  NMR** (400 MHz,  $\text{Me}_2\text{C}=\text{O}-d_6$ )  $\delta$  (ppm) 9.72 (s, 1H), 7.57 (d,  $J = 2.1$  Hz, 1H), 7.35 (dd,  $J = 8.3, 2.2$  Hz, 1H), 6.99 (d,  $J = 8.3$  Hz, 1H), 5.90 (s, 1H), 5.16 (d,  $J = 13.3$  Hz, 1H), 5.11 (d,  $J = 13.3$  Hz, 1H).  **$^{13}\text{C}$  NMR** (100 MHz,  $\text{Me}_2\text{C}=\text{O}-d_6$ )  $\delta$  (ppm) 176.1, 142.6, 131.3, 130.7, 127.8, 126.1, 112.6, 78.8, 74.0. **ESI-HRMS**: calcd. for  $[\text{C}_9\text{H}_7\text{ClN}_2\text{O}_4 + \text{NH}_4]$  260.0433, found 260.0428.

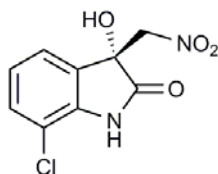

**(R)-7-chloro-3-hydroxy-3-(nitromethyl)indolin-2-one (3i)**: 96% yield;  $[\alpha]_{\text{D}}^{23} = -28$  ( $c$  0.9, THF); 90% ee, determined by HPLC analysis using Daicel chiral AD-H column, Hexane/*i*-PrOH = 85:15. Flow rate: 1.0 mL/min, detection at 254 nm,  $t$  (major) = 12.60 min,  $t$  (minor) = 16.80 min; **IR**:  $\nu$  3277 1735 1623 1556 1476 1420 1379 1322 1221 1179 1144 1071 794 737  $\text{cm}^{-1}$ ;  **$^1\text{H}$  NMR** (400 MHz,  $\text{Me}_2\text{C}=\text{O}-d_6$ )  $\delta$  (ppm) 9.96 (s, 1H), 7.48 (d,  $J = 7.4$  Hz, 1H), 7.37 (dd,  $J = 8.2, 1.0$  Hz, 1H), 7.09 (m, 1H), 5.91 (s, 1H), 5.15 (d,  $J = 13.3$  Hz, 1H), 5.11 (d,  $J = 13.3$  Hz, 1H).  **$^{13}\text{C}$  NMR** (100 MHz,  $\text{Me}_2\text{C}=\text{O}-d_6$ )  $\delta$  (ppm) 176.1, 141.5, 131.4, 130.5, 124.4, 124.3, 115.8, 78.9, 74.6. **ESI-HRMS**: calcd. for  $[\text{C}_9\text{H}_7\text{ClN}_2\text{O}_4 + \text{NH}_4]$  260.0433, found 260.0439.

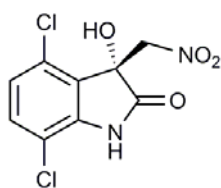

**(R)-4,7-dichloro-3-hydroxy-3-(nitromethyl)indolin-2-one (3j):** 97% yield;  $[\alpha]_D^{23} = -18$  (*c* 0.9, THF); 71% ee, determined by HPLC analysis using Daicel chiral AD-H column, Hexane/*i*-PrOH = 85:15. Flow rate: 1.0 mL/min, detection at 254 nm, *t* (major) = 10.53 min, *t* (minor) = 17.0 min; **IR:**  $\nu$  3276 1741 1618 1556 1471 1423 1380 1306 1168 1073 953 796 665  $\text{cm}^{-1}$ ;  **$^1\text{H}$  NMR** (400 MHz,  $\text{Me}_2\text{C}=\text{O}-d_6$ )  $\delta$  (ppm) 10.18 (s, 1H), 7.41 (d, *J* = 8.8 Hz, 1H), 7.07 (d, *J* = 8.8 Hz, 1H), 6.11 (s, 1H), 5.46 (d, *J* = 13.6 Hz, 1H), 5.25 (d, *J* = 13.6 Hz, 1H).  **$^{13}\text{C}$  NMR** (100 MHz,  $\text{Me}_2\text{C}=\text{O}-d_6$ )  $\delta$  (ppm) 175.4, 143.5, 133.0, 131.0, 126.3, 125.1, 114.9, 77.0, 75.4. **ESI-HRMS:** calcd. for  $[\text{C}_9\text{H}_6\text{Cl}_2\text{N}_2\text{O}_4 + \text{NH}_4]$  294.0043, found 294.0050.

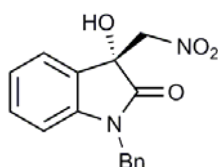

**(R)-1-benzyl-3-hydroxy-3-(nitromethyl)indolin-2-one (3k):** 95% yield;  $[\alpha]_D^{23} = -31$  (*c* 1.0, THF); 76% ee, determined by HPLC analysis using Daicel chiral OJ-H column, Hexane/*i*-PrOH = 85:15. Flow rate: 1.0 mL/min, detection at 254 nm, *t* (minor) = 31.59 min, *t* (major) = 33.52 min; **IR:**  $\nu$  3358 1711 1614 1554 1491 1468 1426 1377 1179 1076 753 700  $\text{cm}^{-1}$ ;  **$^1\text{H}$  NMR** (400 MHz,  $\text{Me}_2\text{C}=\text{O}-d_6$ )  $\delta$  (ppm) 7.54 (dd, *J* = 7.4, 1.2 Hz, 1H), 7.43 (m, 2H), 7.34 (m, 2H), 7.28 (m, 2H), 7.07 (td, *J* = 7.6, 0.9 Hz, 1H), 6.87 (d, *J* = 7.9 Hz, 1H), 5.88 (s, 1H), 5.20 (d, *J* = 13.0 Hz, 1H), 5.15 (d, *J* = 13.0 Hz, 1H), 5.00 (d, *J* = 15.9 Hz, 1H), 4.94 (d, *J* = 15.9 Hz, 1H).  **$^{13}\text{C}$  NMR** (100 MHz,  $\text{Me}_2\text{C}=\text{O}-d_6$ )  $\delta$  (ppm) 175.4, 144.7, 137.1, 131.5, 129.6, 128.4, 128.3, 128.1, 125.4, 123.7, 110.7, 79.1, 73.9, 44.3. **ESI-MS:** *m/z*: 299.2  $[\text{M} + \text{H}]^+$ .

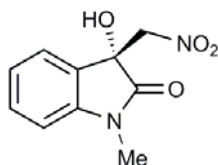

**(R)-1-methyl-3-hydroxy-3-(nitromethyl)indolin-2-one (3l):** 95% yield;  $[\alpha]_D^{23} = -70$  (*c* 0.6, THF); 91% ee, determined by HPLC analysis using Daicel chiral AD-H column, Hexane/*i*-PrOH = 90:10. Flow rate: 1.0 mL/min, detection at 254 nm, *t* (minor) = 14.90 min, *t* (major) = 13.77 min; **IR:**  $\nu$  3346 1716 1615 1554 1495 1472 1425 1380 1352 1247 1113 1097 756  $\text{cm}^{-1}$ ;  **$^1\text{H}$  NMR** (400 MHz,  $\text{Me}_2\text{C}=\text{O}-d_6$ )  $\delta$  (ppm)

7.51 (dd,  $J = 7.4, 0.7$  Hz, 1H), 7.40 (td,  $J = 7.8, 1.2$  Hz, 1H), 7.10 (td,  $J = 7.6, 0.8$  Hz, 1H), 7.02 (d,  $J = 7.9$  Hz, 1H), 5.71 (s, 1H), 5.09 (d,  $J = 13.0$  Hz, 1H), 5.05 (d,  $J = 13.0$  Hz, 1H), 3.20 (s, 3H);  $^{13}\text{C}$  NMR (100 MHz,  $\text{Me}_2\text{C}=\text{O}-d_6$ )  $\delta$  (ppm) 175.01, 145.58, 131.59, 128.06, 125.26, 123.55, 109.74, 79.34, 73.84, 26.58. **ESI-MS**:  $m/z$ : 223.2  $[\text{M} + \text{H}]^+$ .

## 2.2 Synthesis of (*R*)-(+)-dioxibrassinin (**4**)

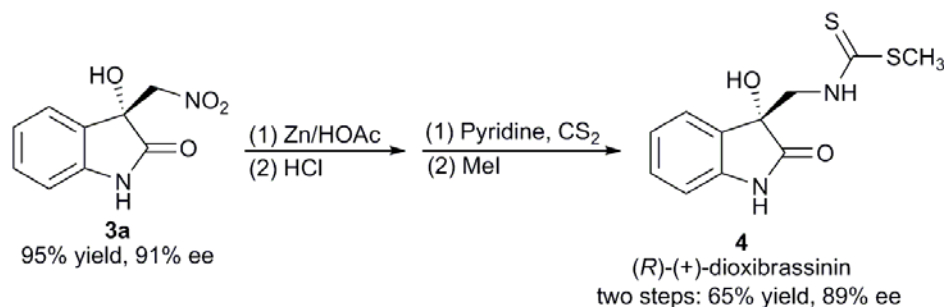

To the solution of **3a** (96 mg, 0.46 mmol, 1.0 equiv., 91% ee) in acetic acid (6.0 mL), zinc dust (1.19 g, 1.84 mmol, 40.0 equiv.) was added slowly. After 15 h at r.t., the mixture was filtered over Celite, washed with methanol, and then acidified with concentrated HCl (0.5 mL). After removal of solvent and acid, pyridine (1.0 mL) and  $\text{Et}_3\text{N}$  (0.2 mL) were added and the mixture was cooled to 0 °C. Thereafter,  $\text{CS}_2$  (44  $\mu\text{L}$ ) was added. After 2 h at 0 °C, MeI (46  $\mu\text{L}$ ) was added and the mixture was stirred at r.t. for 5 h, followed by the treatment with concentrated HCl (1.5 mL) and extraction with EtOAc. The combined organic phase was dried over  $\text{Na}_2\text{SO}_4$  and concentrated *in vacuo*. The residue was purified by flash chromatography ( $\text{CH}_2\text{Cl}_2/\text{CH}_3\text{OH} = 90:1-70:1$ ) to give a white foam of (*R*)-(+)-dioxibrassinin (**4**)<sup>5</sup>: 65% yield (over two steps);  $[\alpha]_{\text{D}}^{23} = +10$  ( $c$  0.6,  $\text{CH}_3\text{OH}$ ); 89% ee, determined by HPLC analysis using Daicel chiral AD-H column, Hexane/*i*-PrOH = 85:15. Flow rate: 1.0 mL/min, detection at 254 nm,  $t$  (minor) = 12.68 min,  $t$  (major) = 17.56 min; **IR**:  $\nu$  3269 1719 1622 1509 1472 1379 1331 1254 1222 1189 1096 943 754  $\text{cm}^{-1}$ ;  $^1\text{H}$  NMR (400 MHz,  $\text{Me}_2\text{C}=\text{O}-d_6$ )  $\delta$  (ppm) 9.51 (s, 1H), 8.85 (s, 1H), 7.44 (d,  $J = 7.4$  Hz, 1H), 7.28 (td,  $J = 7.7, 1.1$  Hz, 1H), 7.03 (td,  $J = 7.6, 0.7$  Hz, 1H), 6.96 (t,  $J = 11.0$  Hz, 1H), 5.46 (s, 1H), 4.41 (dd,  $J = 14.0, 6.1$  Hz, 1H), 3.88 (dd,  $J = 14.0, 3.9$  Hz, 1H) 2.58 (s, 3H).  $^{13}\text{C}$  NMR (100 MHz,  $\text{Me}_2\text{C}=\text{O}-d_6$ )  $\delta$  (ppm) 200.4, 178.5, 142.5, 130.8, 130.7, 125.4, 123.3, 111.1, 75.0, 53.5, 18.05. **ESI-MS**:  $m/z$ : 269.1  $[\text{M} + \text{H}]^+$ .

5. K. Monde, K. Sasaki, A. Shirata and M. Takasugi, *Phytochemistry*, 1991, **30**, 2915.

### 3. Crystal data and structure refinement for enantiopure product 3g

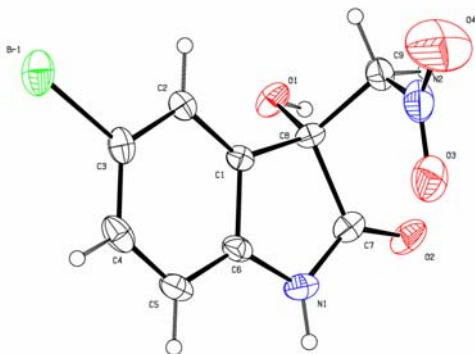

|                                                                               |                                                               |
|-------------------------------------------------------------------------------|---------------------------------------------------------------|
| Compound reference                                                            | p21                                                           |
| Chemical formula                                                              | C <sub>9</sub> H <sub>7</sub> BrN <sub>2</sub> O <sub>4</sub> |
| Formula Mass                                                                  | 287.08                                                        |
| Crystal system                                                                | Monoclinic                                                    |
| <i>a</i> /Å                                                                   | 7.437(15)                                                     |
| <i>b</i> /Å                                                                   | 6.480(13)                                                     |
| <i>c</i> /Å                                                                   | 10.87(2)                                                      |
| $\alpha$ /°                                                                   | 90.00                                                         |
| $\beta$ /°                                                                    | 90.185(17)                                                    |
| $\gamma$ /°                                                                   | 90.00                                                         |
| Unit cell volume/Å <sup>3</sup>                                               | 523.6(18)                                                     |
| Temperature/K                                                                 | 296(2)                                                        |
| Space group                                                                   | <i>P</i> 2(1)                                                 |
| No. of formula units per unit cell, <i>Z</i>                                  | 2                                                             |
| No. of reflections measured                                                   | 3567                                                          |
| No. of independent reflections                                                | 1895                                                          |
| <i>R</i> <sub>int</sub>                                                       | 0.0669                                                        |
| Final <i>R</i> <sub>I</sub> values ( <i>I</i> > 2σ( <i>I</i> ))               | 0.0488                                                        |
| Final <i>wR</i> ( <i>F</i> <sup>2</sup> ) values ( <i>I</i> > 2σ( <i>I</i> )) | 0.1074                                                        |
| Final <i>R</i> <sub>I</sub> values (all data)                                 | 0.0776                                                        |
| Final <i>wR</i> ( <i>F</i> <sup>2</sup> ) values (all data)                   | 0.1191                                                        |
| Goodness of fit on <i>F</i> <sup>2</sup>                                      | 0.981                                                         |
| Flack parameter                                                               | 0.024(19)                                                     |
| CCDC number                                                                   | 828228                                                        |

#### 4. NMR spectra and HPLC chromatograms

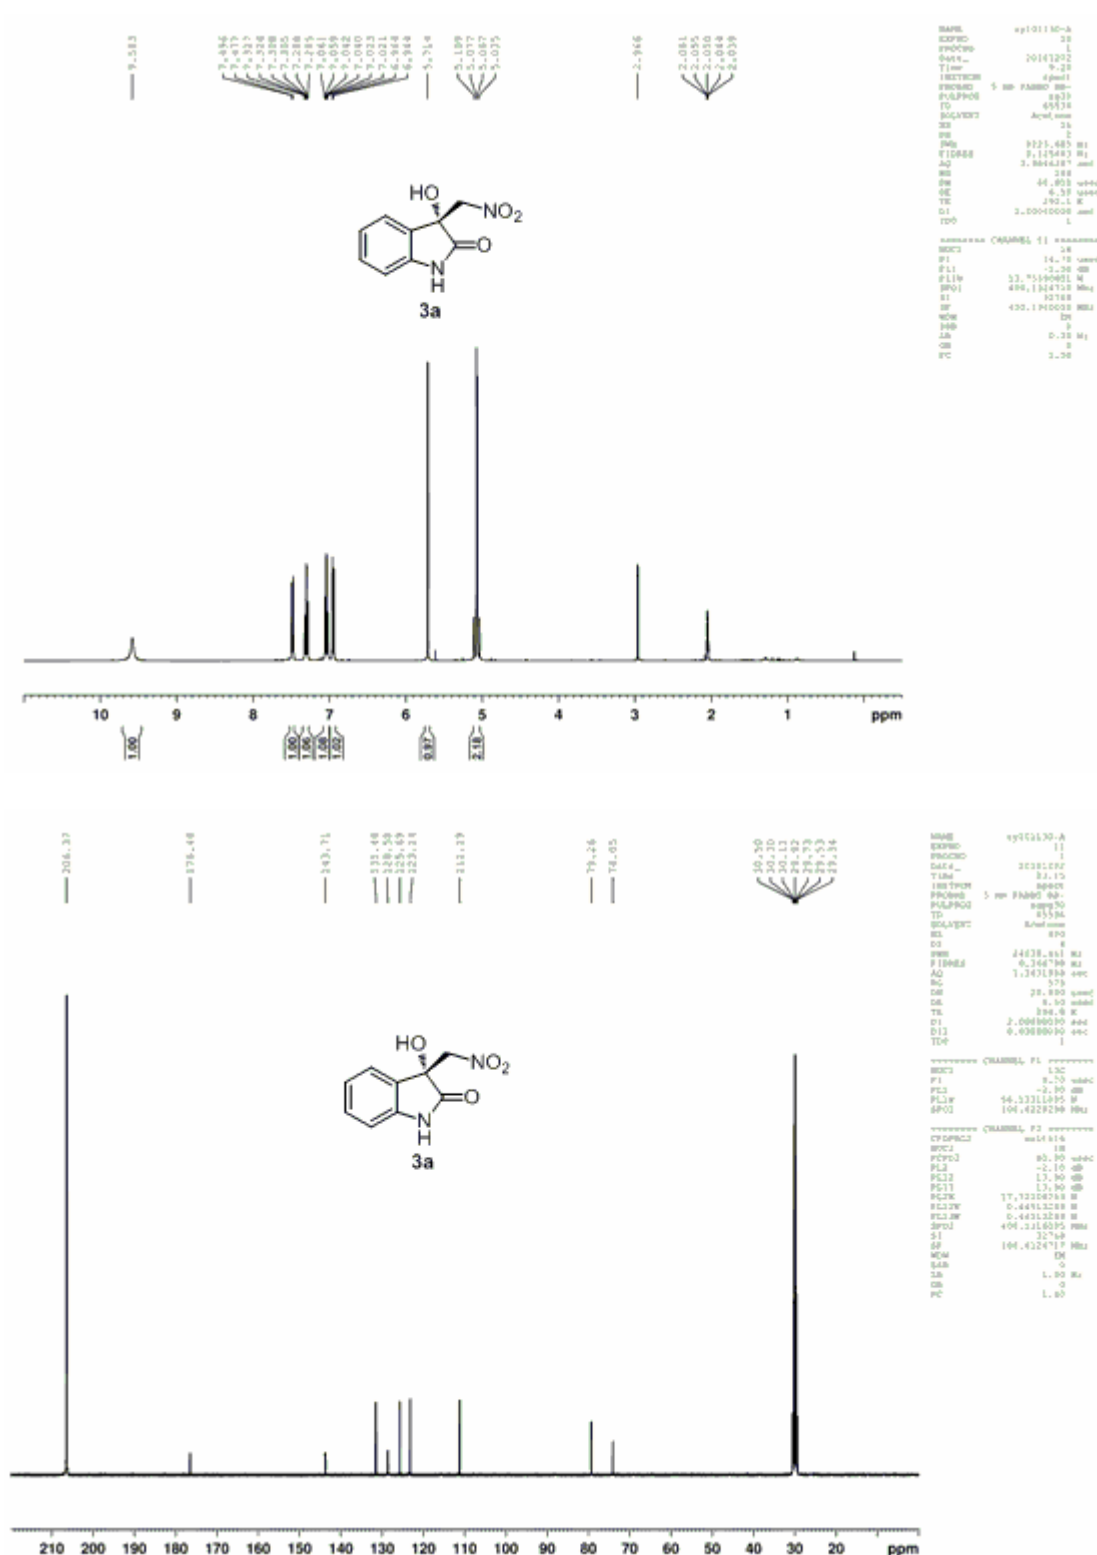

**3a racemic**

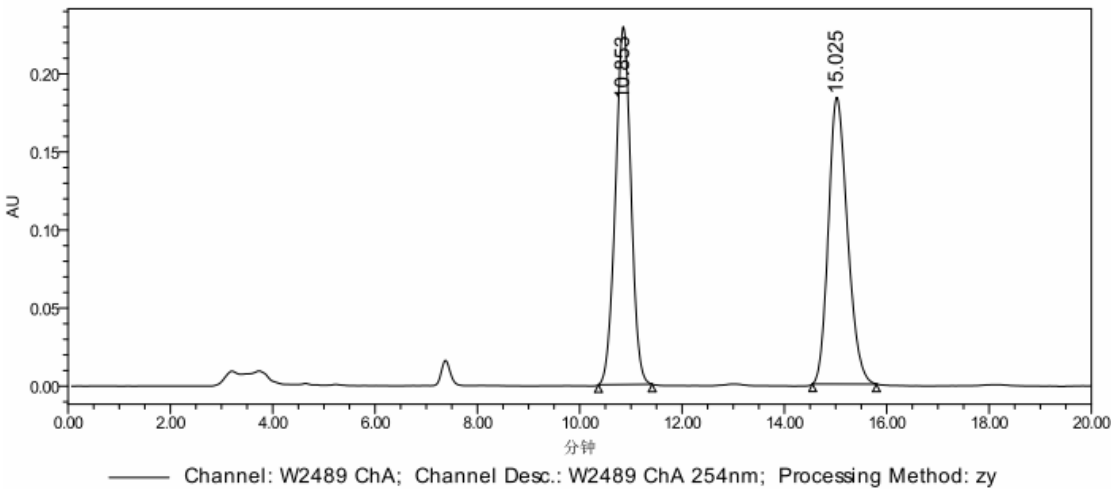

**3a chiral**

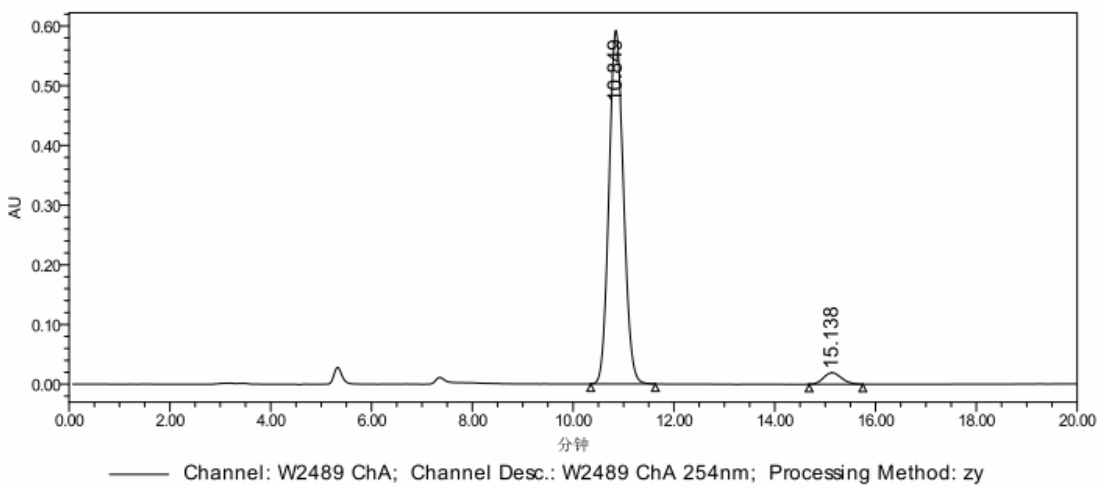

|   | Retention Time | Area     | % Area | Height |
|---|----------------|----------|--------|--------|
| 1 | 10.849         | 11791646 | 96.10  | 591896 |
| 2 | 15.138         | 479160   | 3.90   | 19217  |

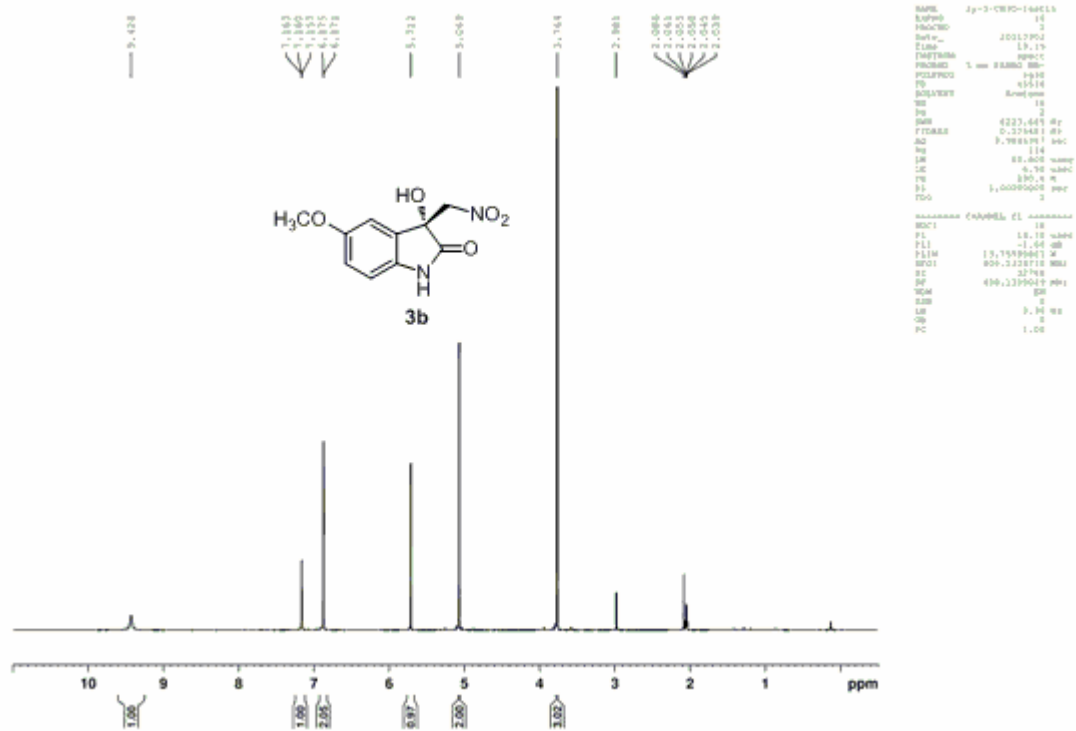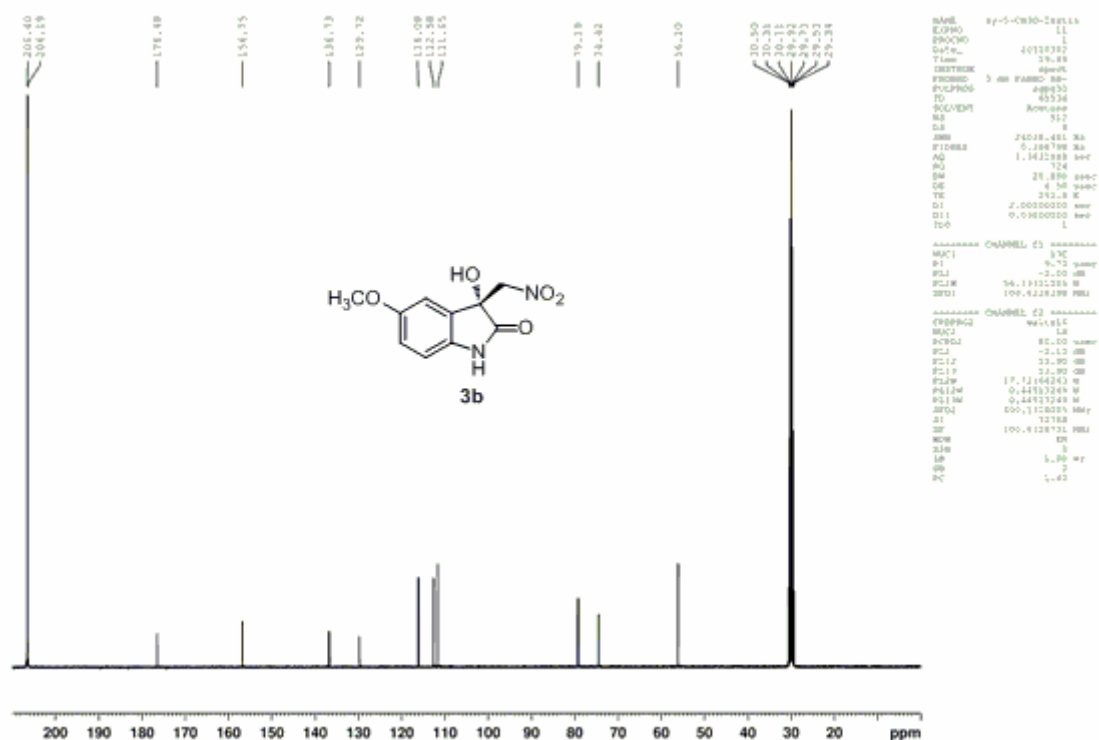

**3b racemic**

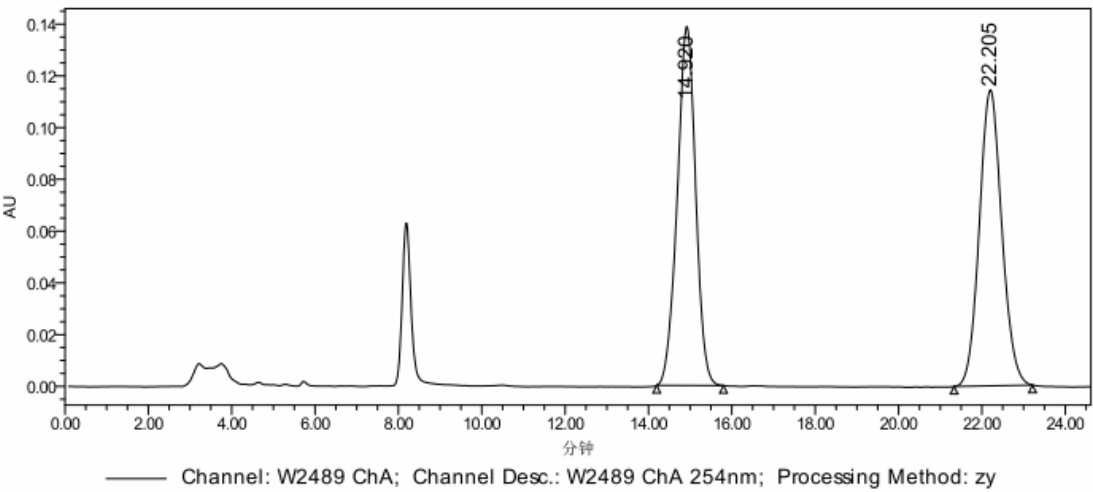

**3b chiral**

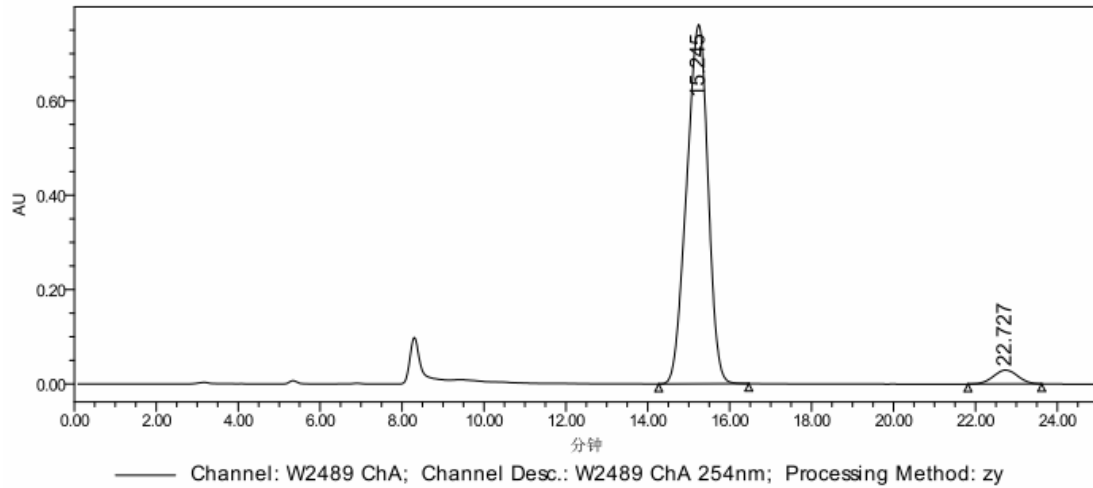

|   | Retention Time | Area     | % Area | Height |
|---|----------------|----------|--------|--------|
| 1 | 15.245         | 27630868 | 95.78  | 760897 |
| 2 | 22.727         | 1218318  | 4.22   | 29417  |

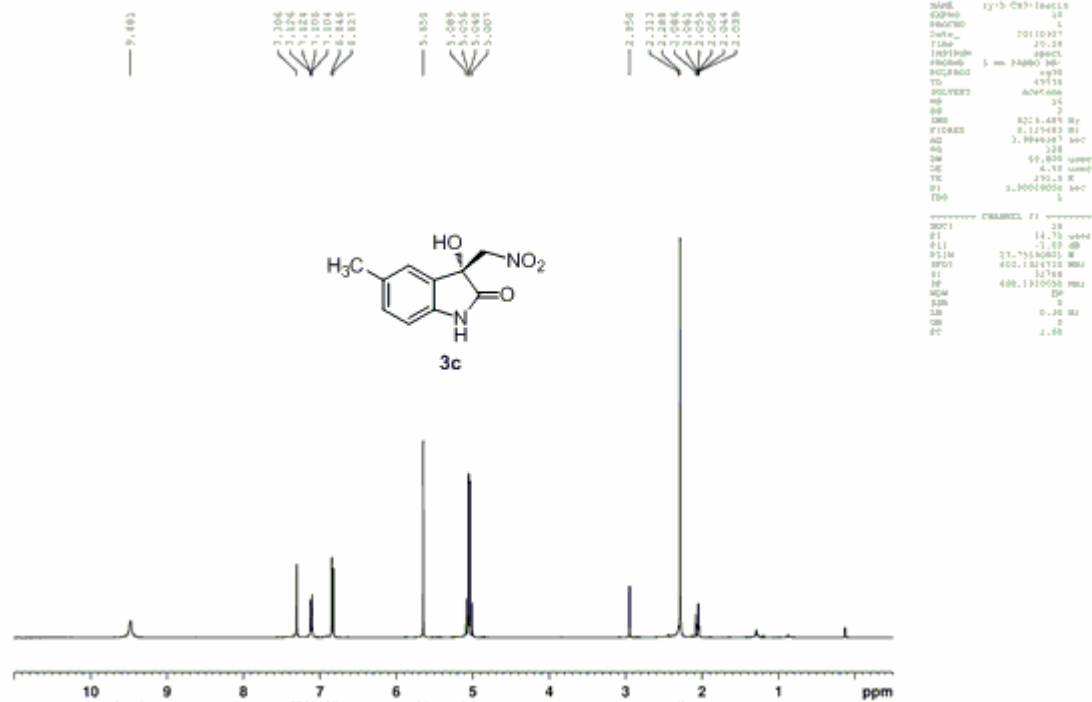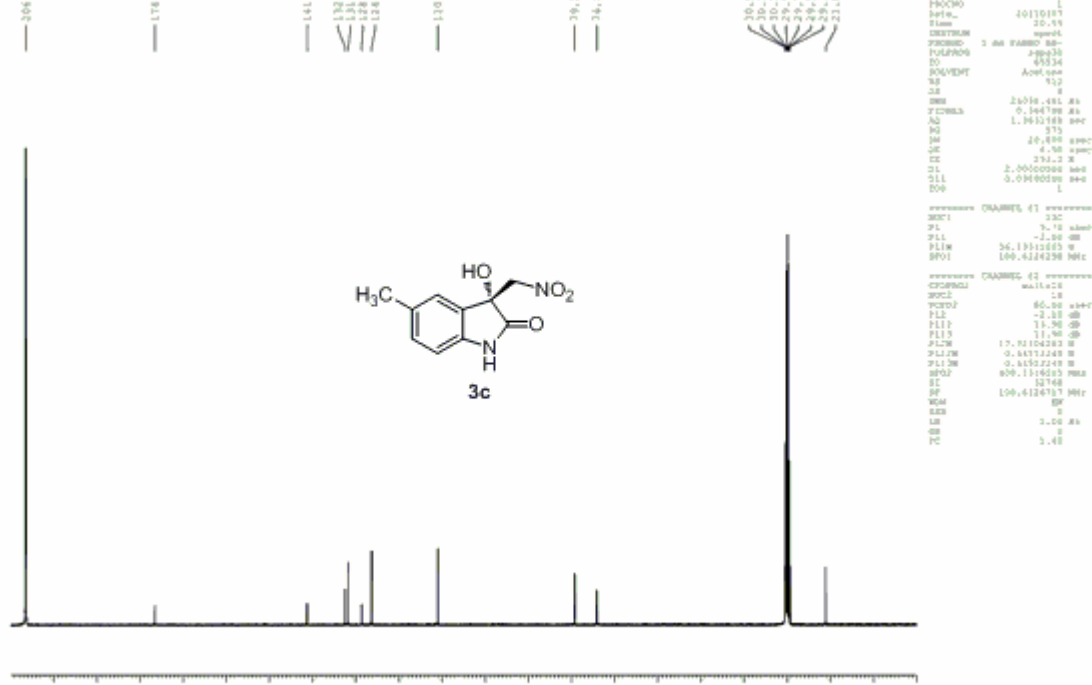

**3c racemic**

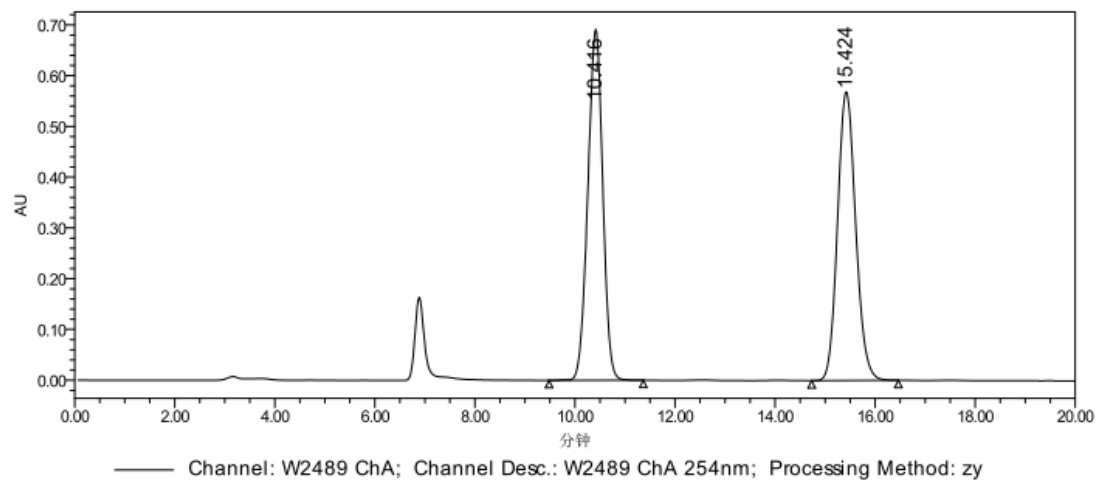

**3c chiral**

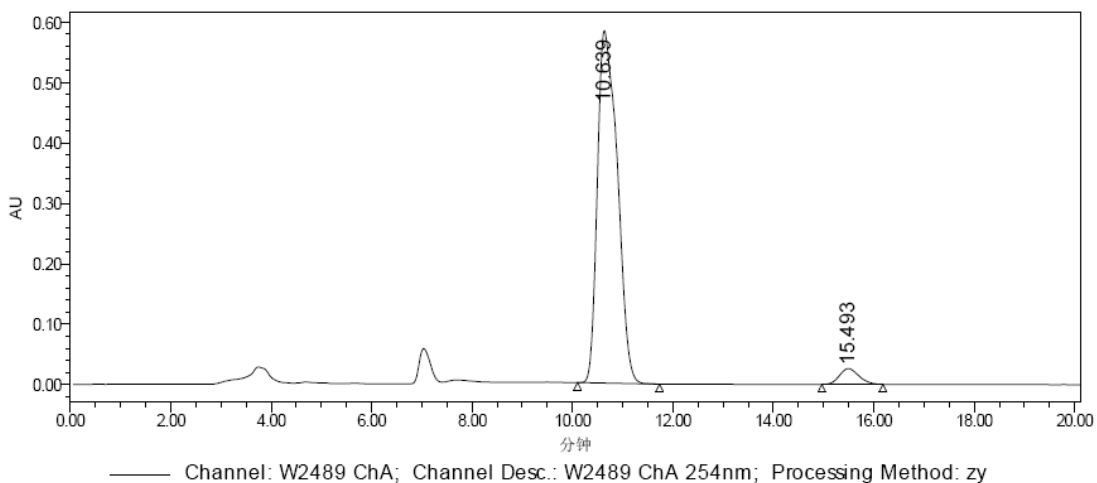

|   | Retention Time | Area     | % Area | Height |
|---|----------------|----------|--------|--------|
| 1 | 10.639         | 16028350 | 95.78  | 583686 |
| 2 | 15.493         | 707042   | 4.22   | 26261  |

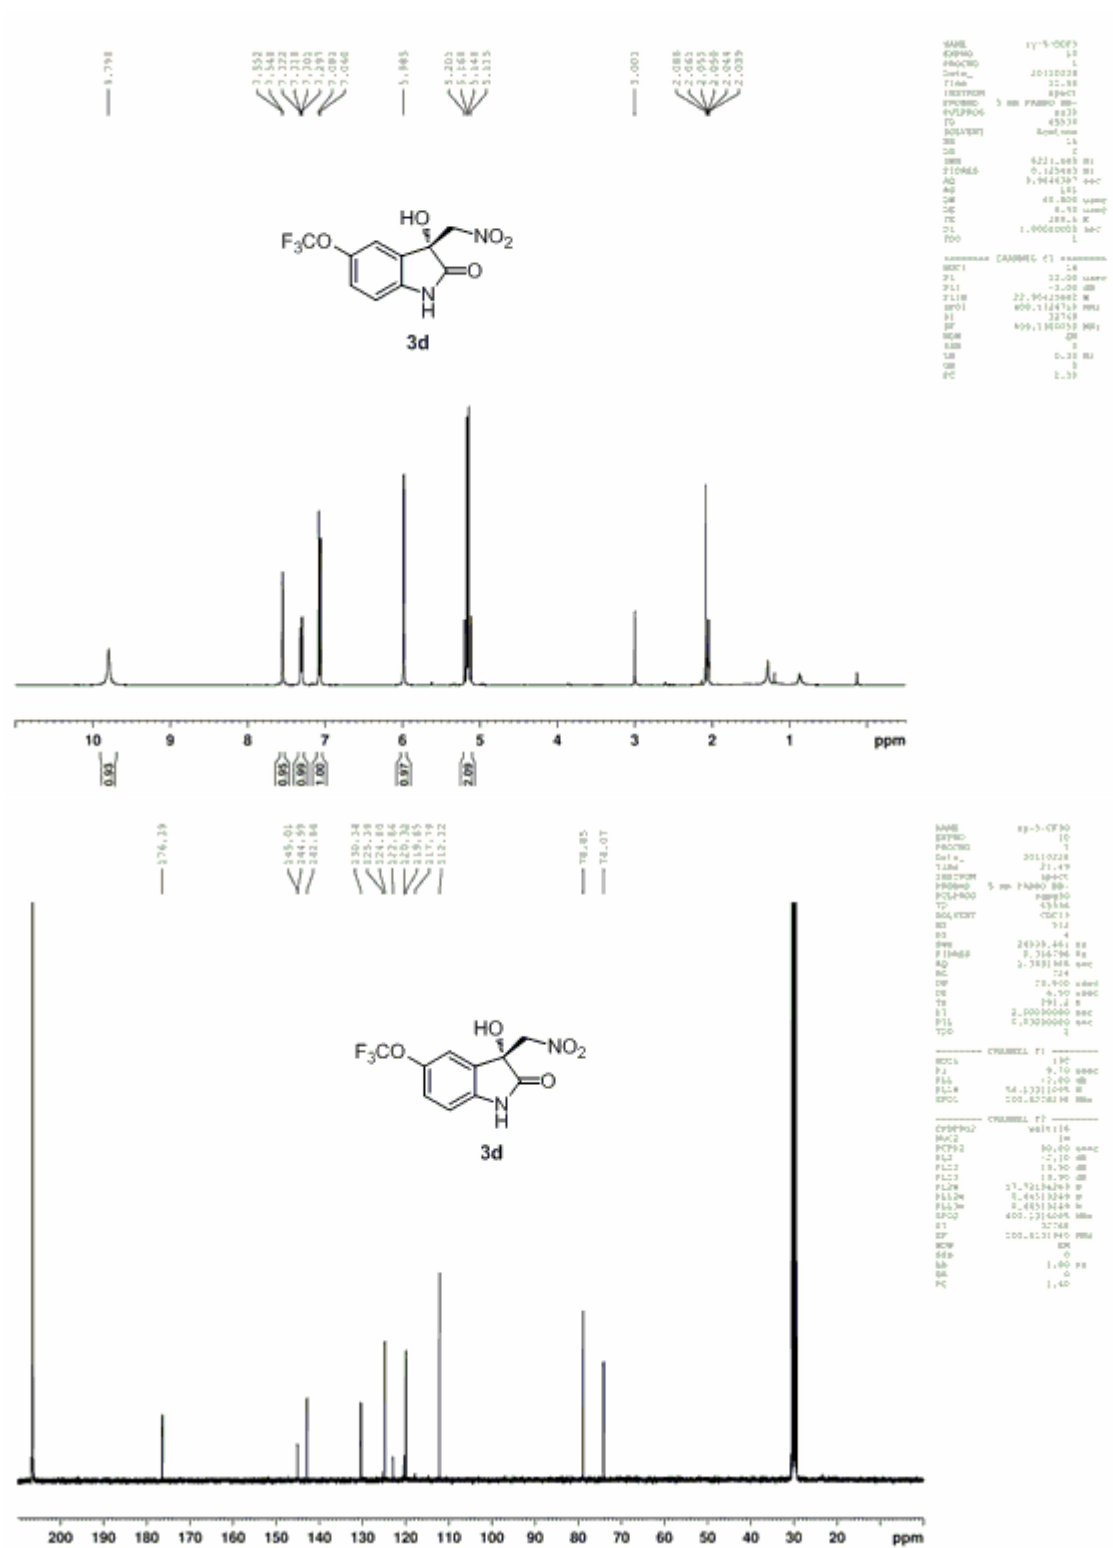

**3d** racemic

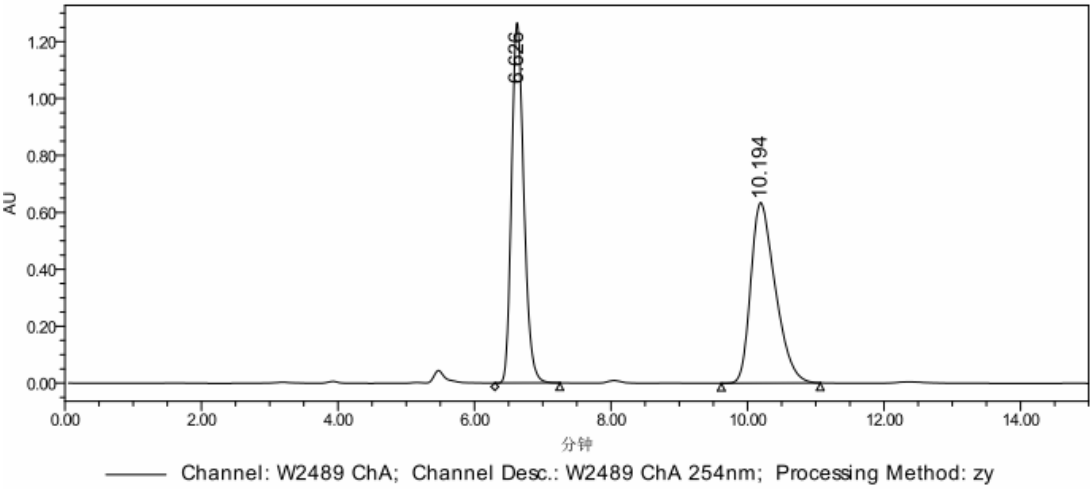

**3d** chiral

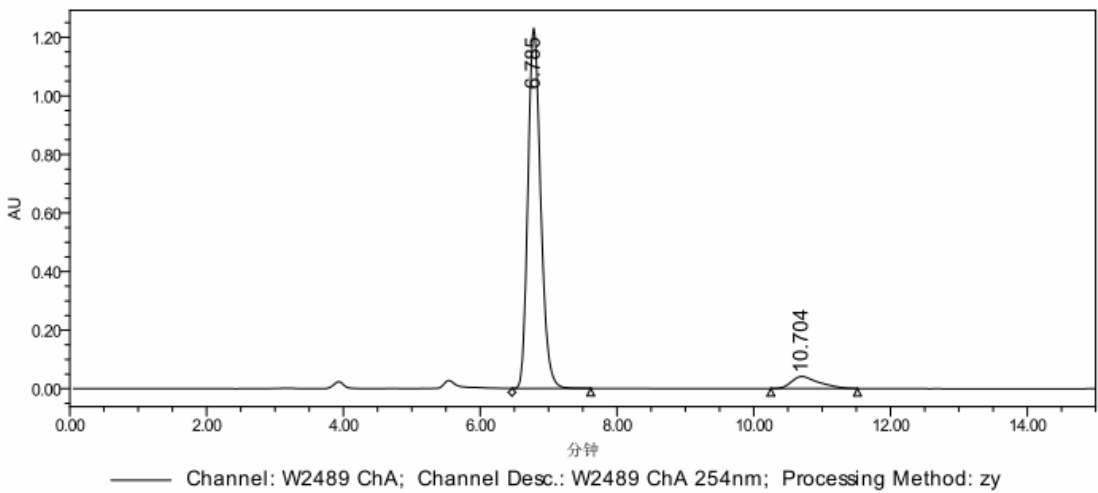

|   | Retention Time | Area     | % Area | Height  |
|---|----------------|----------|--------|---------|
| 1 | 6.785          | 15973513 | 93.25  | 1229268 |
| 2 | 10.704         | 1155652  | 6.75   | 41297   |

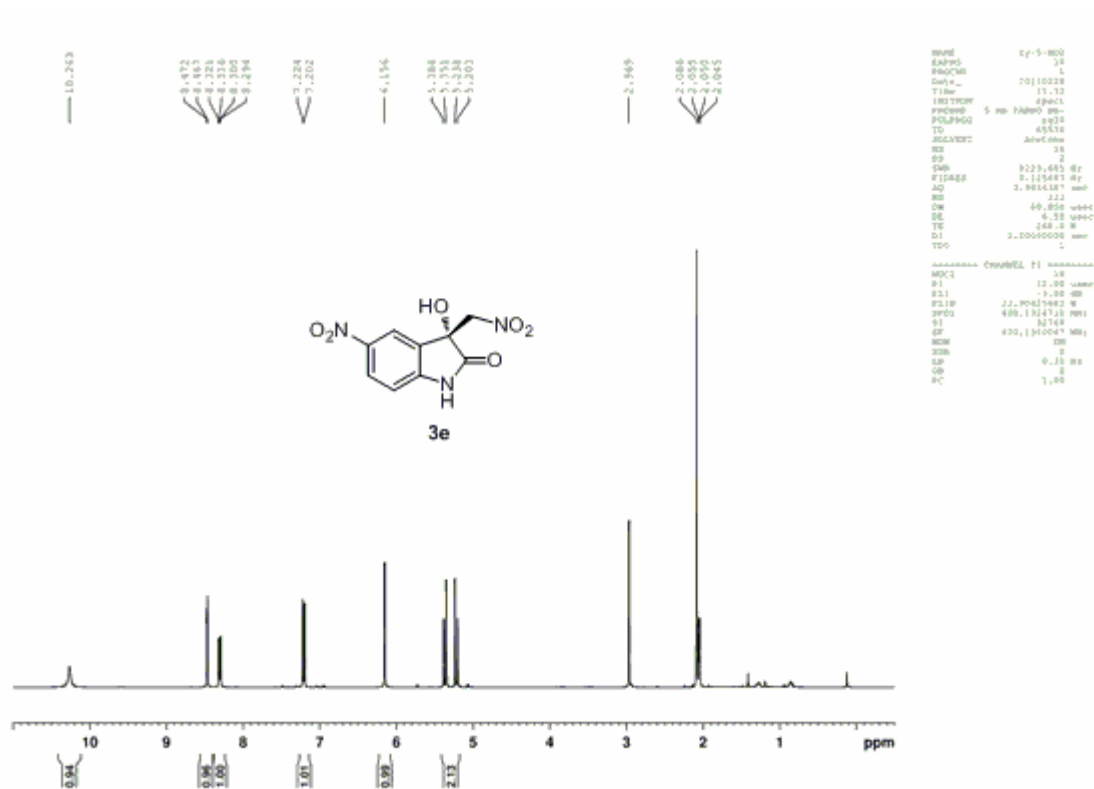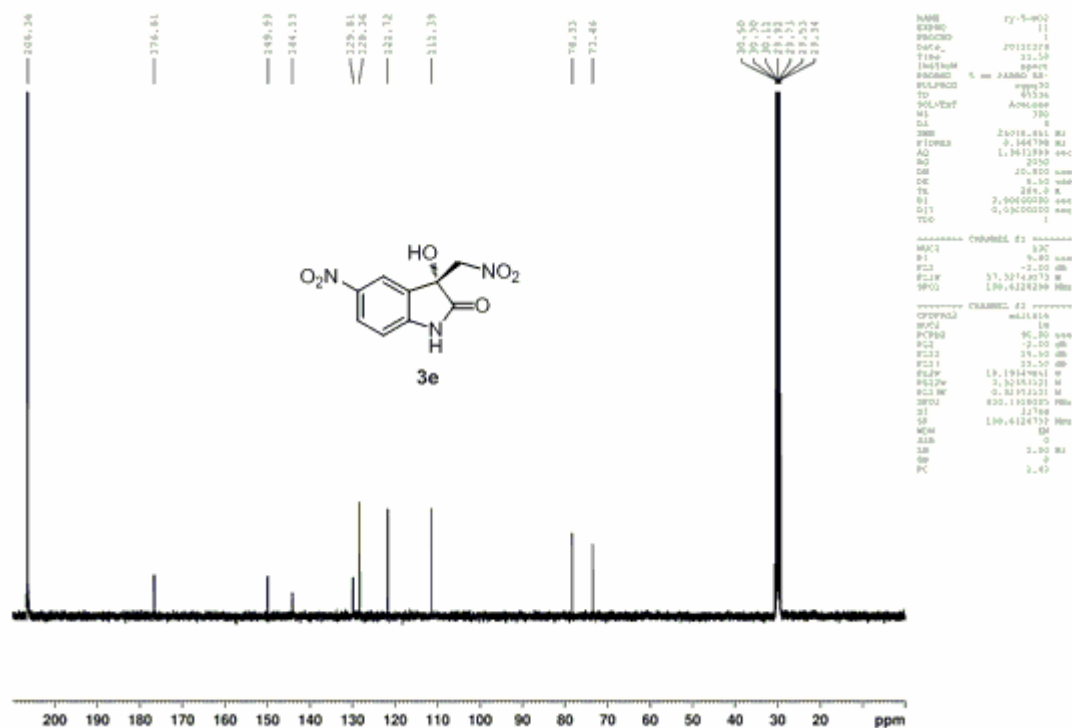

**3e racemic**

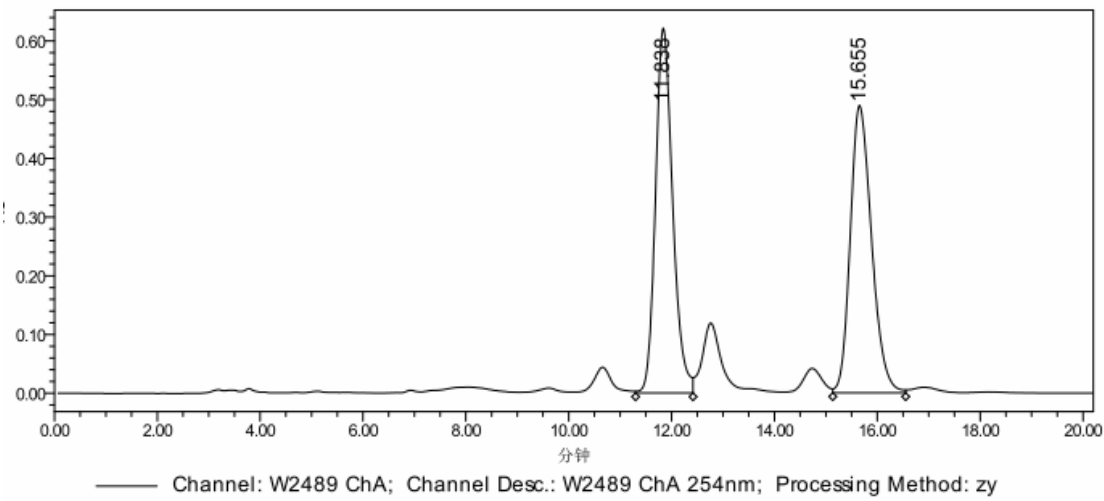

**3e chiral**

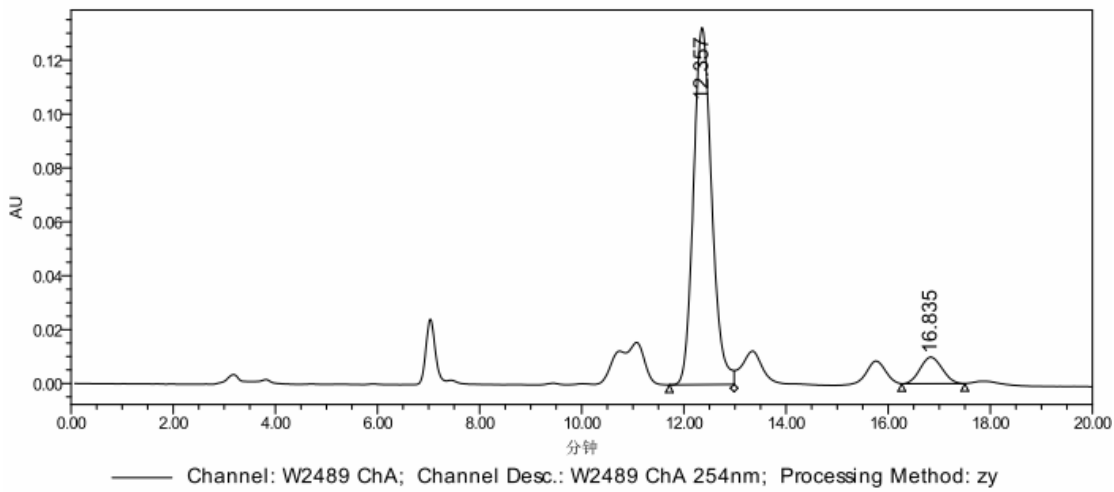

|   | Retention Time | Area    | % Area | Height |
|---|----------------|---------|--------|--------|
| 1 | 12.357         | 3291733 | 91.84  | 132451 |
| 2 | 16.835         | 292589  | 8.16   | 9837   |

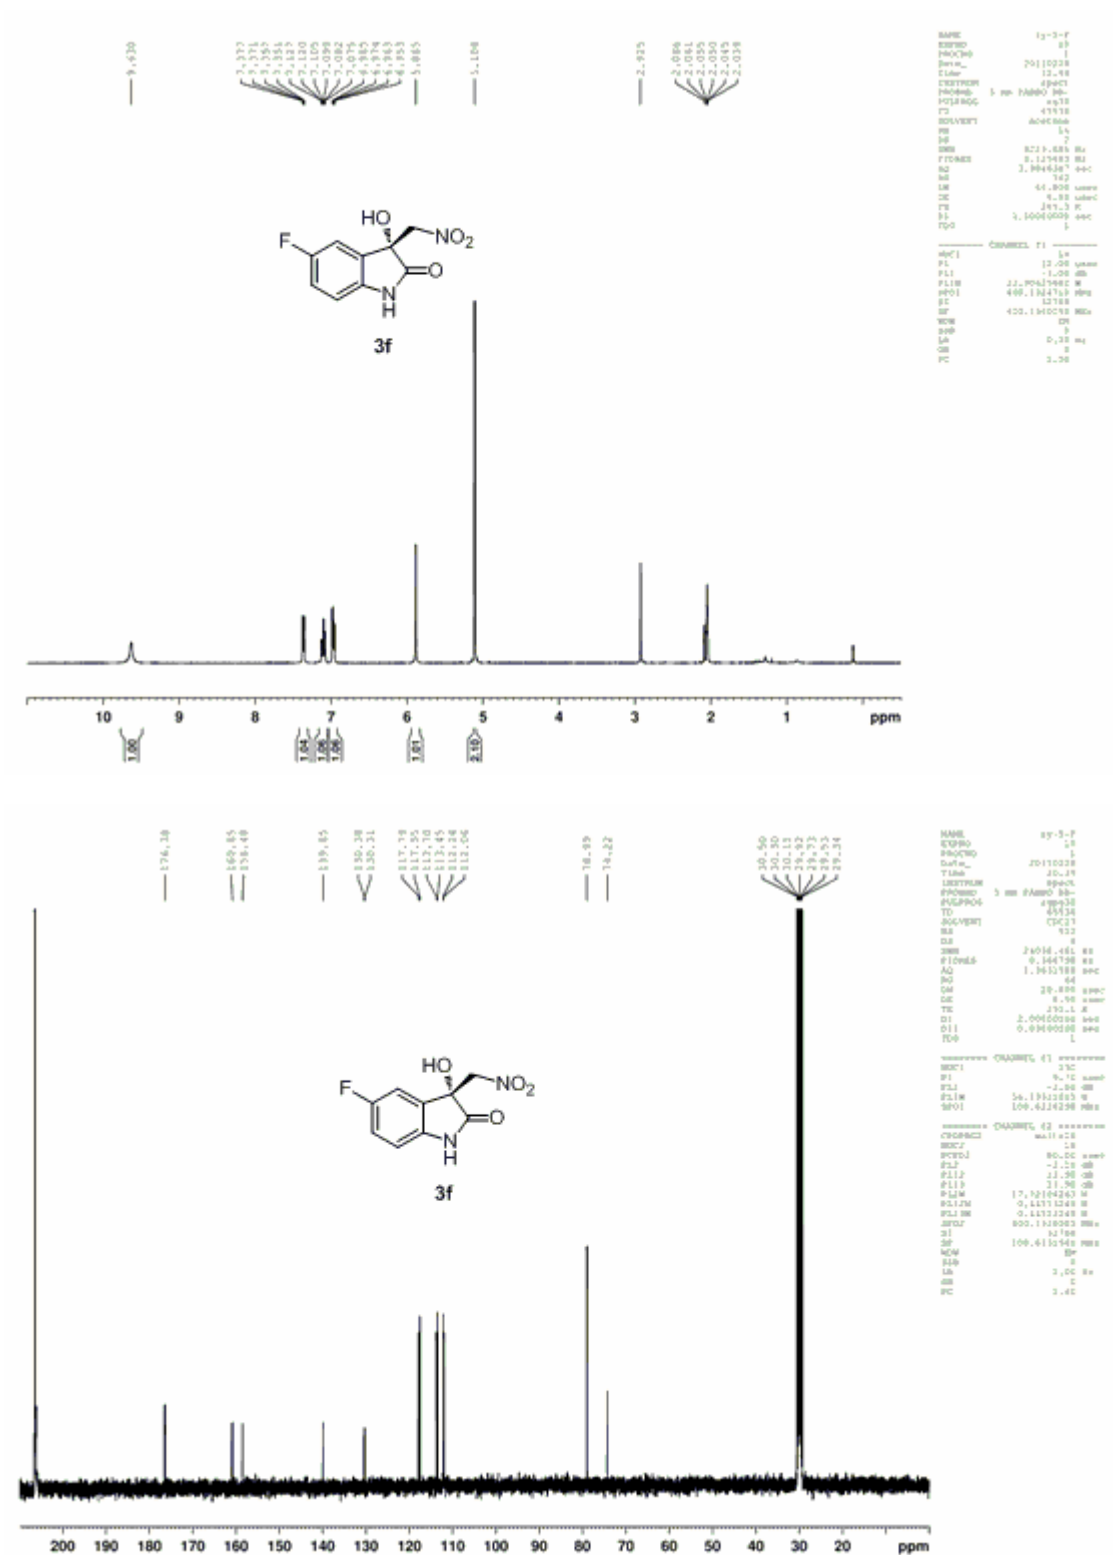

**3f racemic**

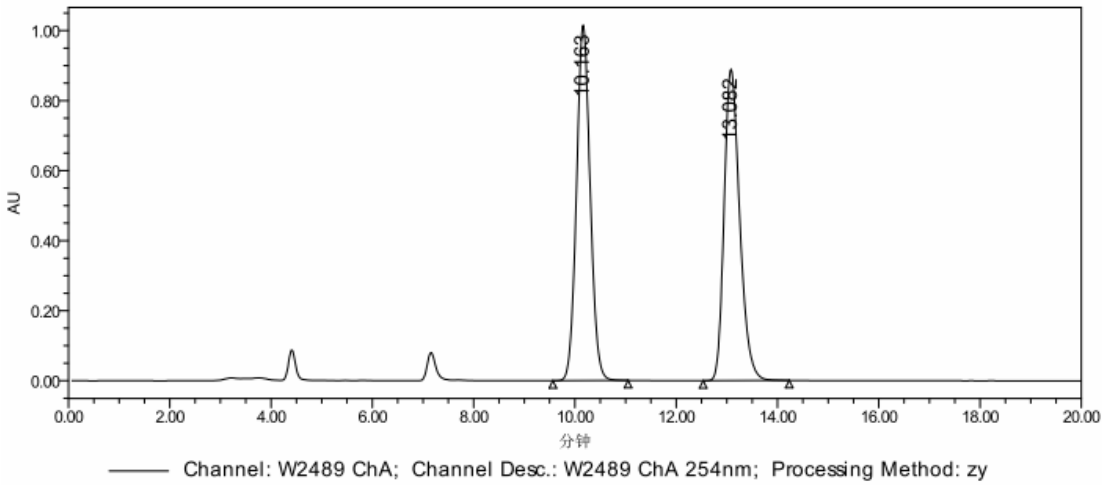

**3f chiral**

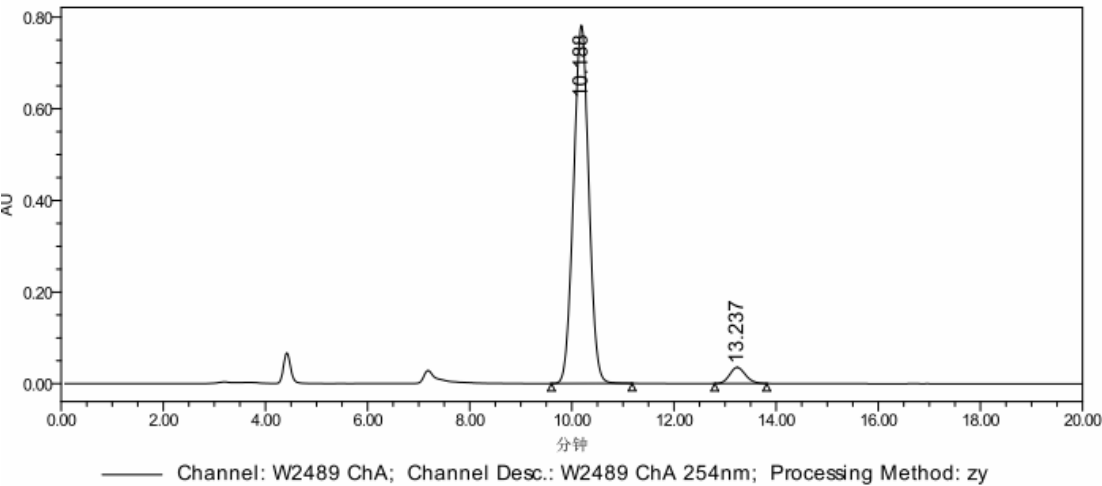

|   | Retention Time | Area     | % Area | Height |
|---|----------------|----------|--------|--------|
| 1 | 10.188         | 16192217 | 95.51  | 781798 |
| 2 | 13.237         | 760789   | 4.49   | 35349  |

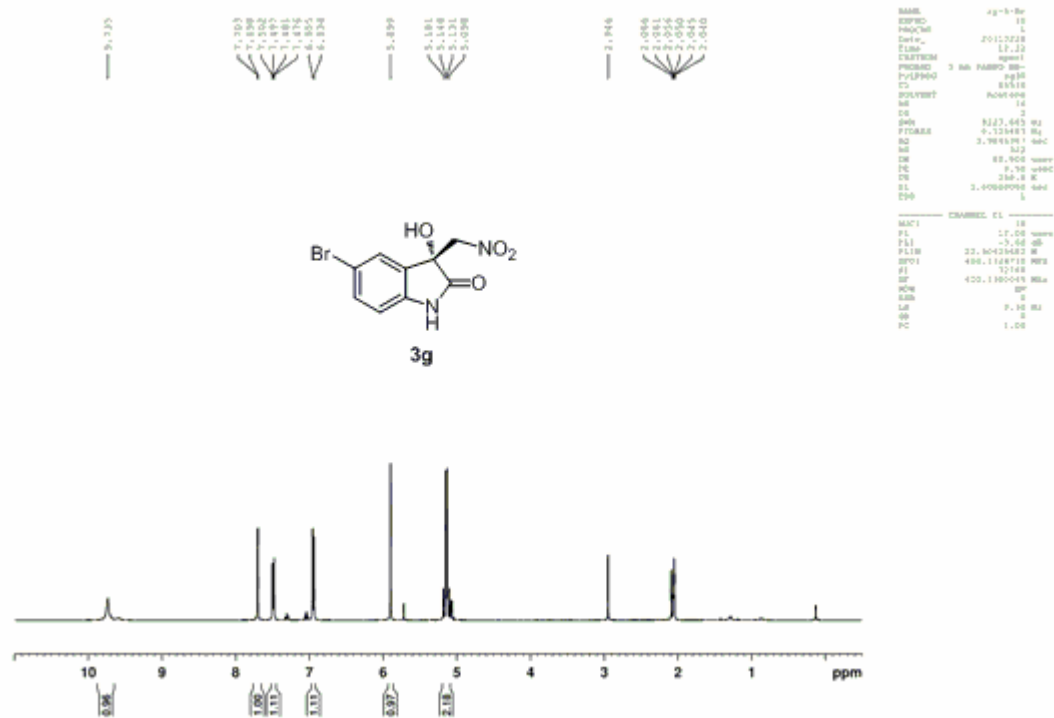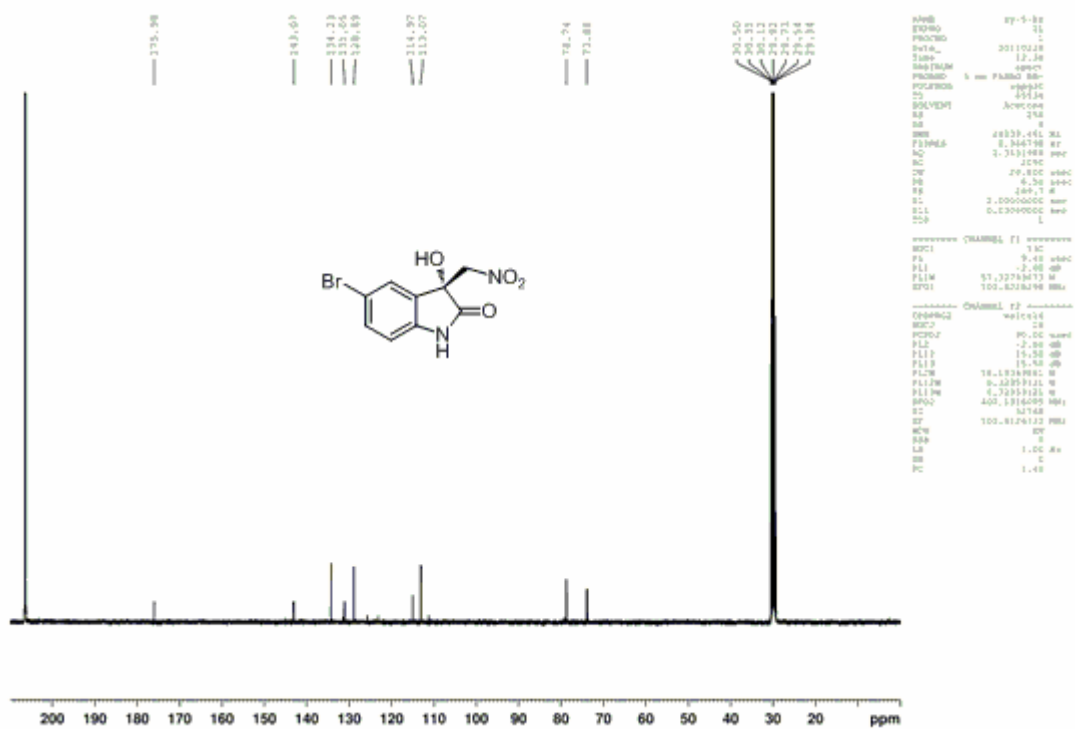

**3g racemic**

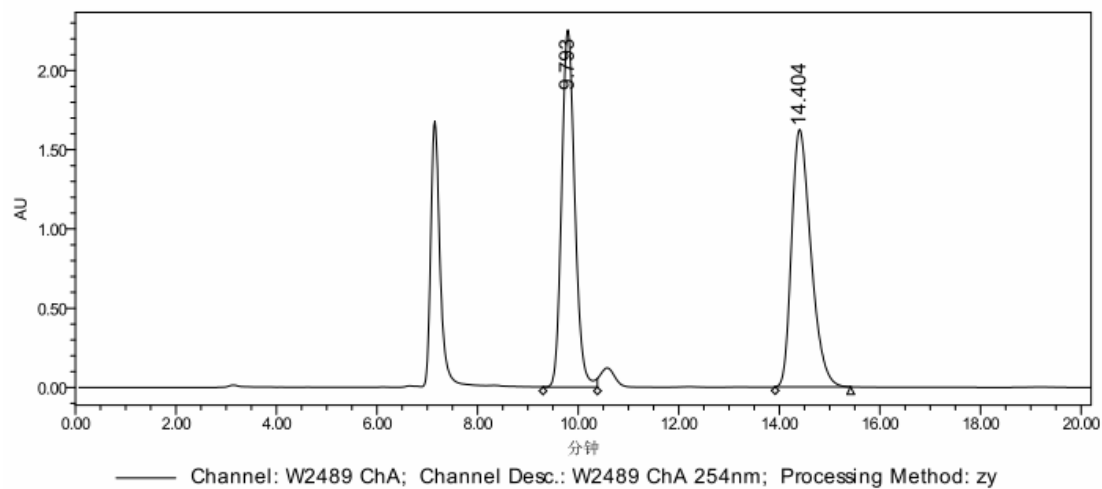

**3g chiral**

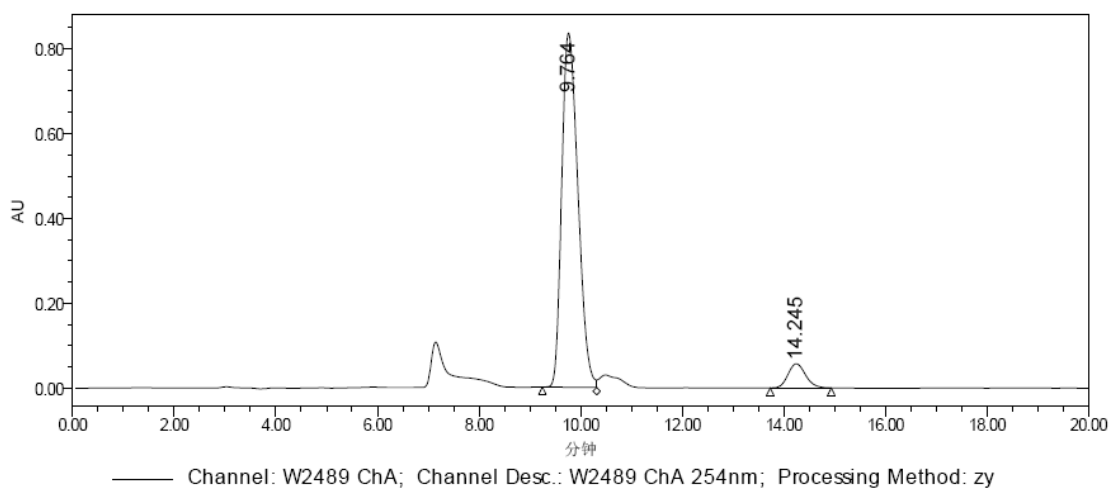

|   | Retention Time | Area     | % Area | Height |
|---|----------------|----------|--------|--------|
| 1 | 9.764          | 18487819 | 93.12  | 835079 |
| 2 | 14.245         | 1364906  | 6.88   | 57049  |

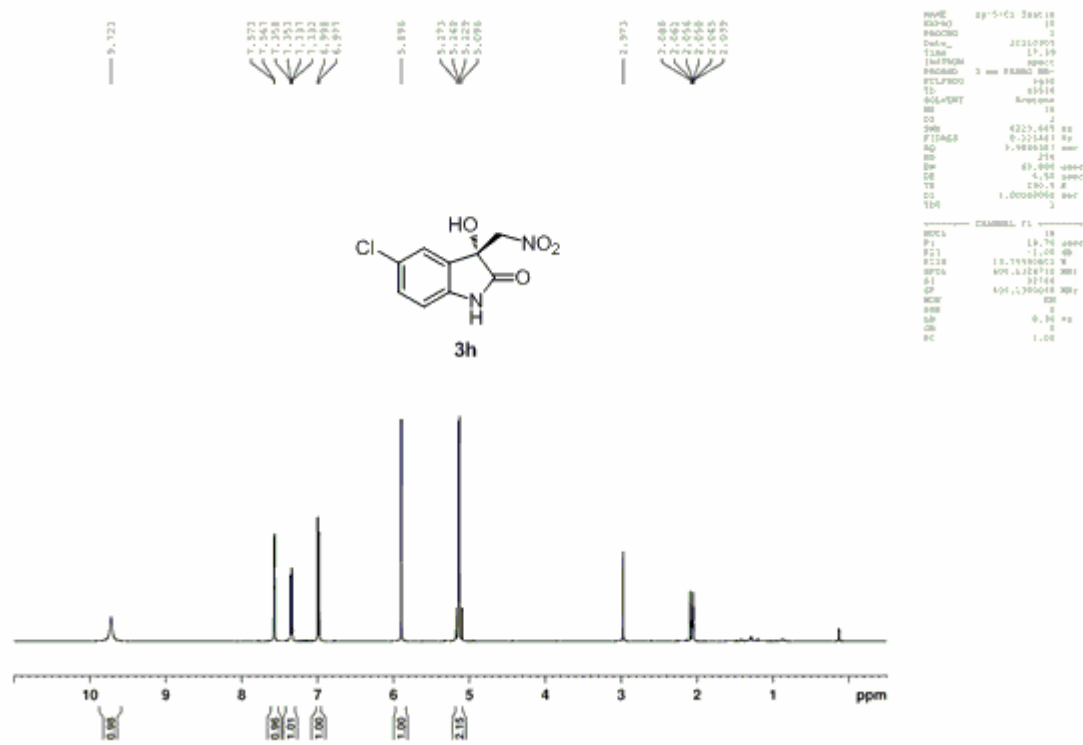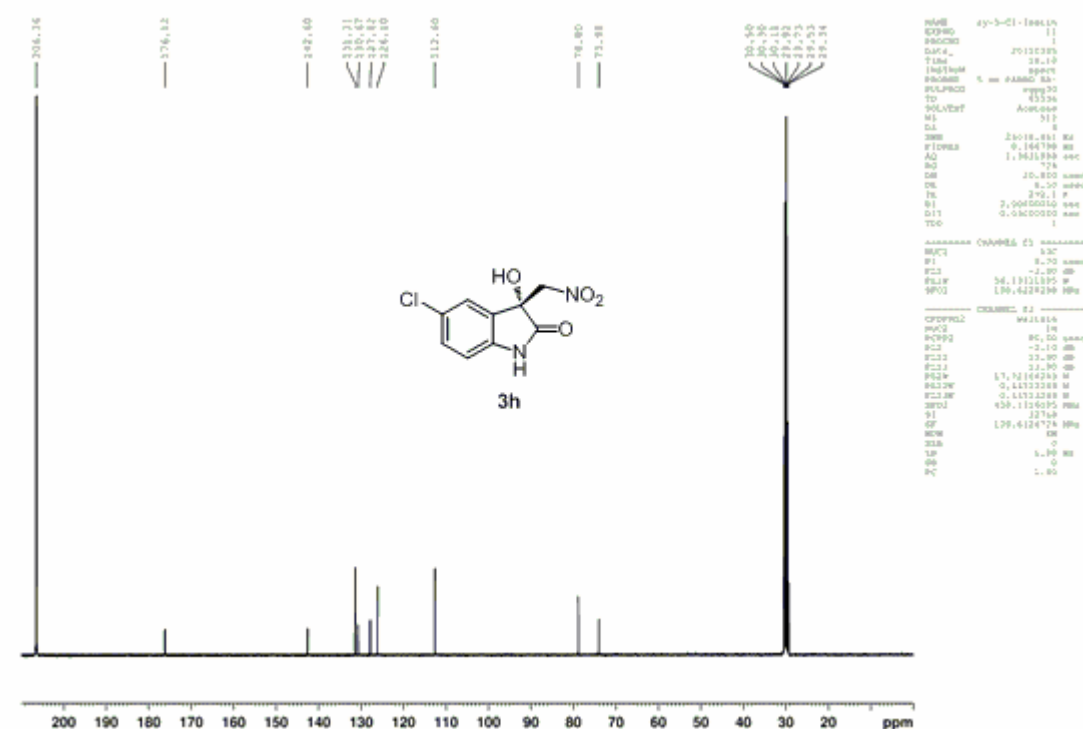

**3h** racemic

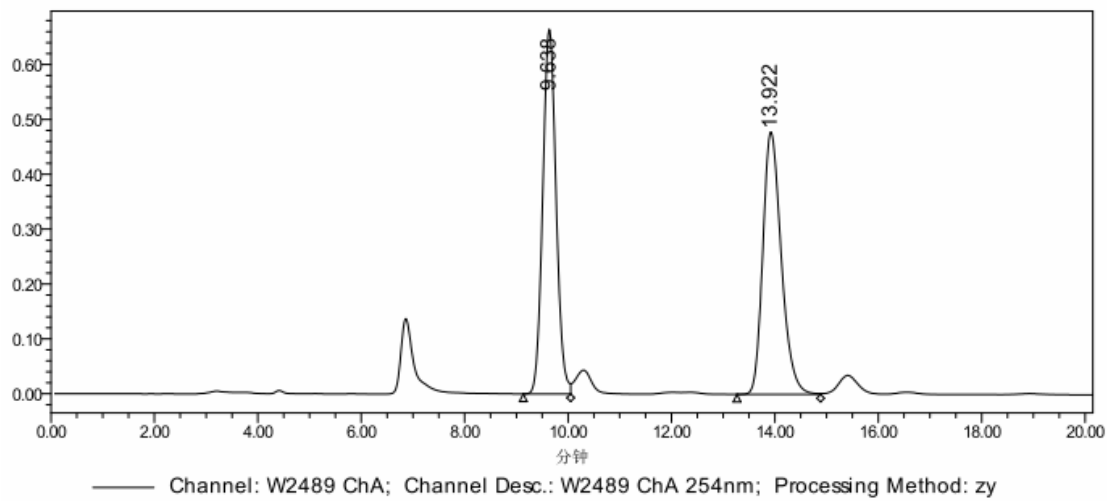

**3h** chiral

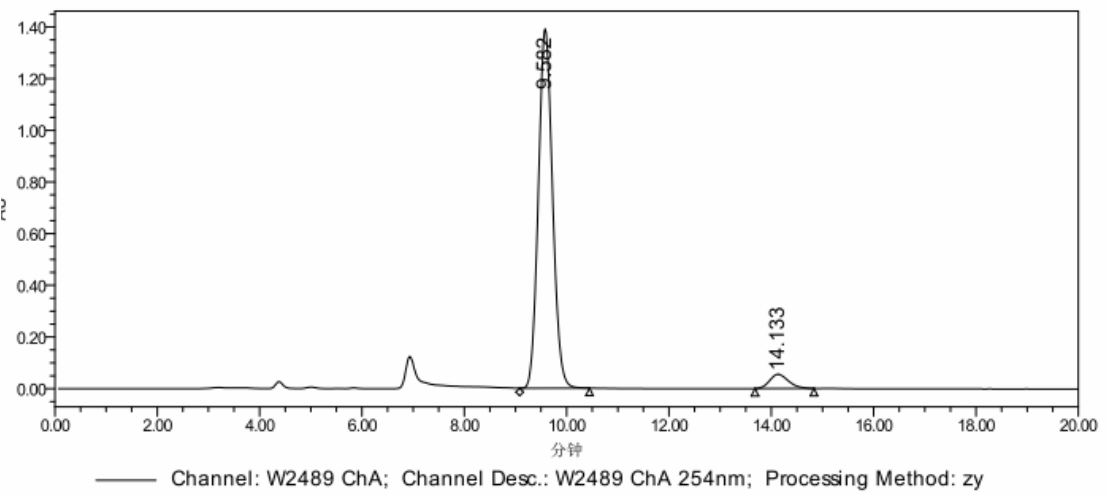

|   | Retention Time | Area     | % Area | Height  |
|---|----------------|----------|--------|---------|
| 1 | 9.582          | 26710512 | 95.03  | 1389681 |
| 2 | 14.133         | 1397104  | 4.97   | 54946   |

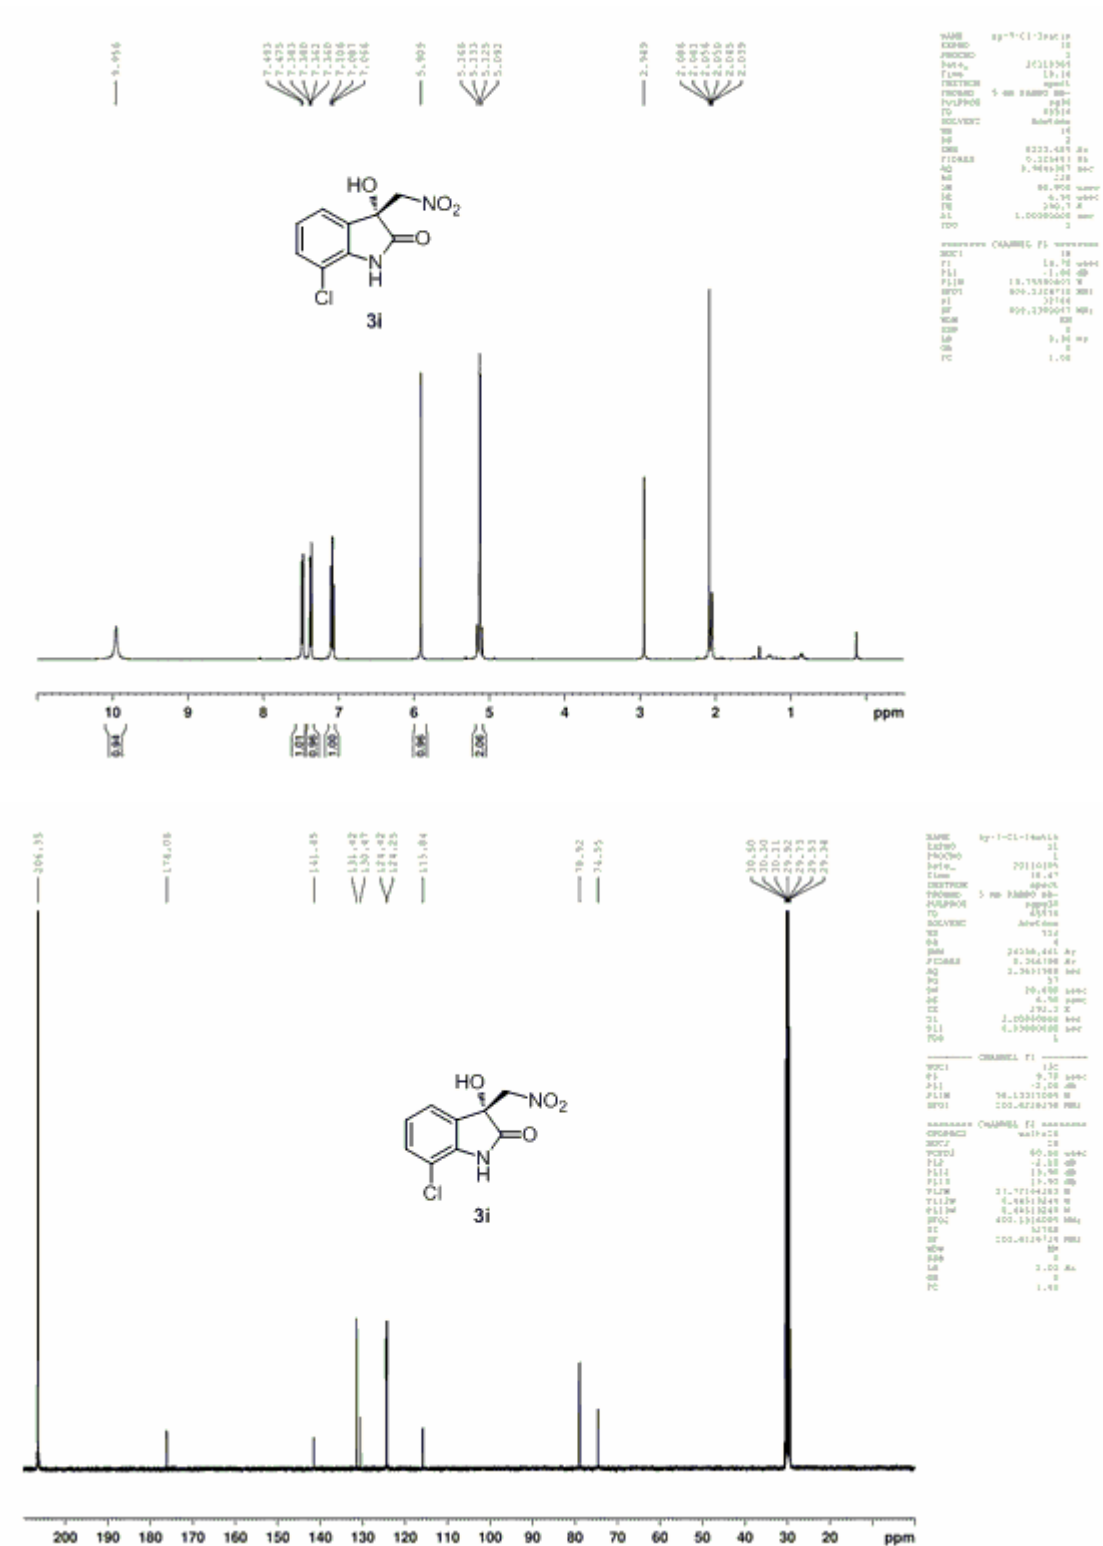

**3i** racemic

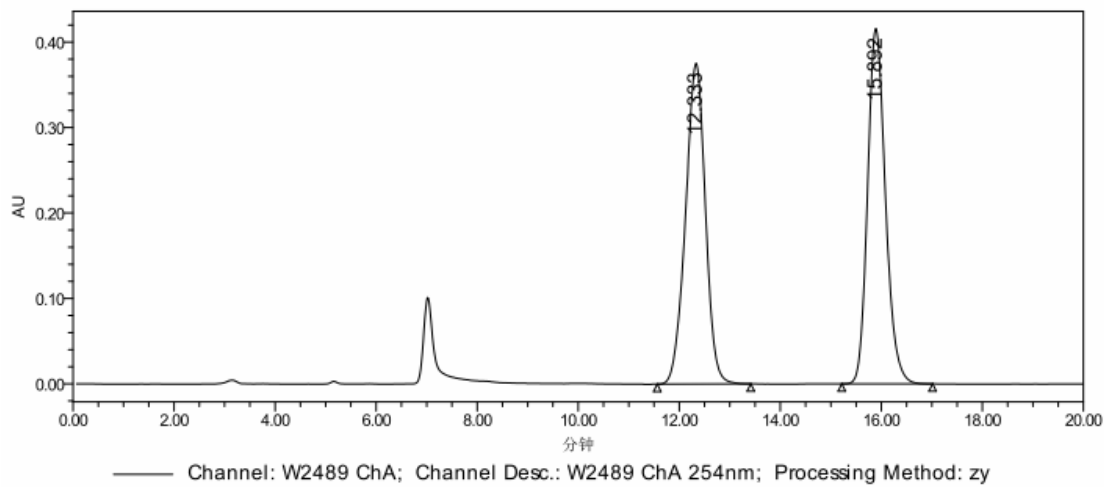

**3i** chiral

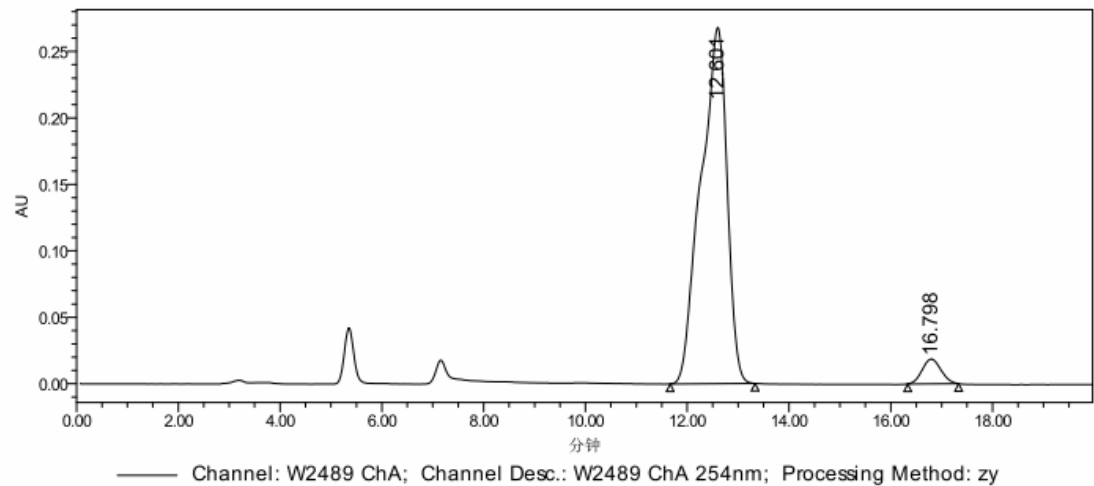

|   | Retention Time | Area    | % Area | Height |
|---|----------------|---------|--------|--------|
| 1 | 12.601         | 9569166 | 95.26  | 267902 |
| 2 | 16.798         | 476576  | 4.74   | 18558  |

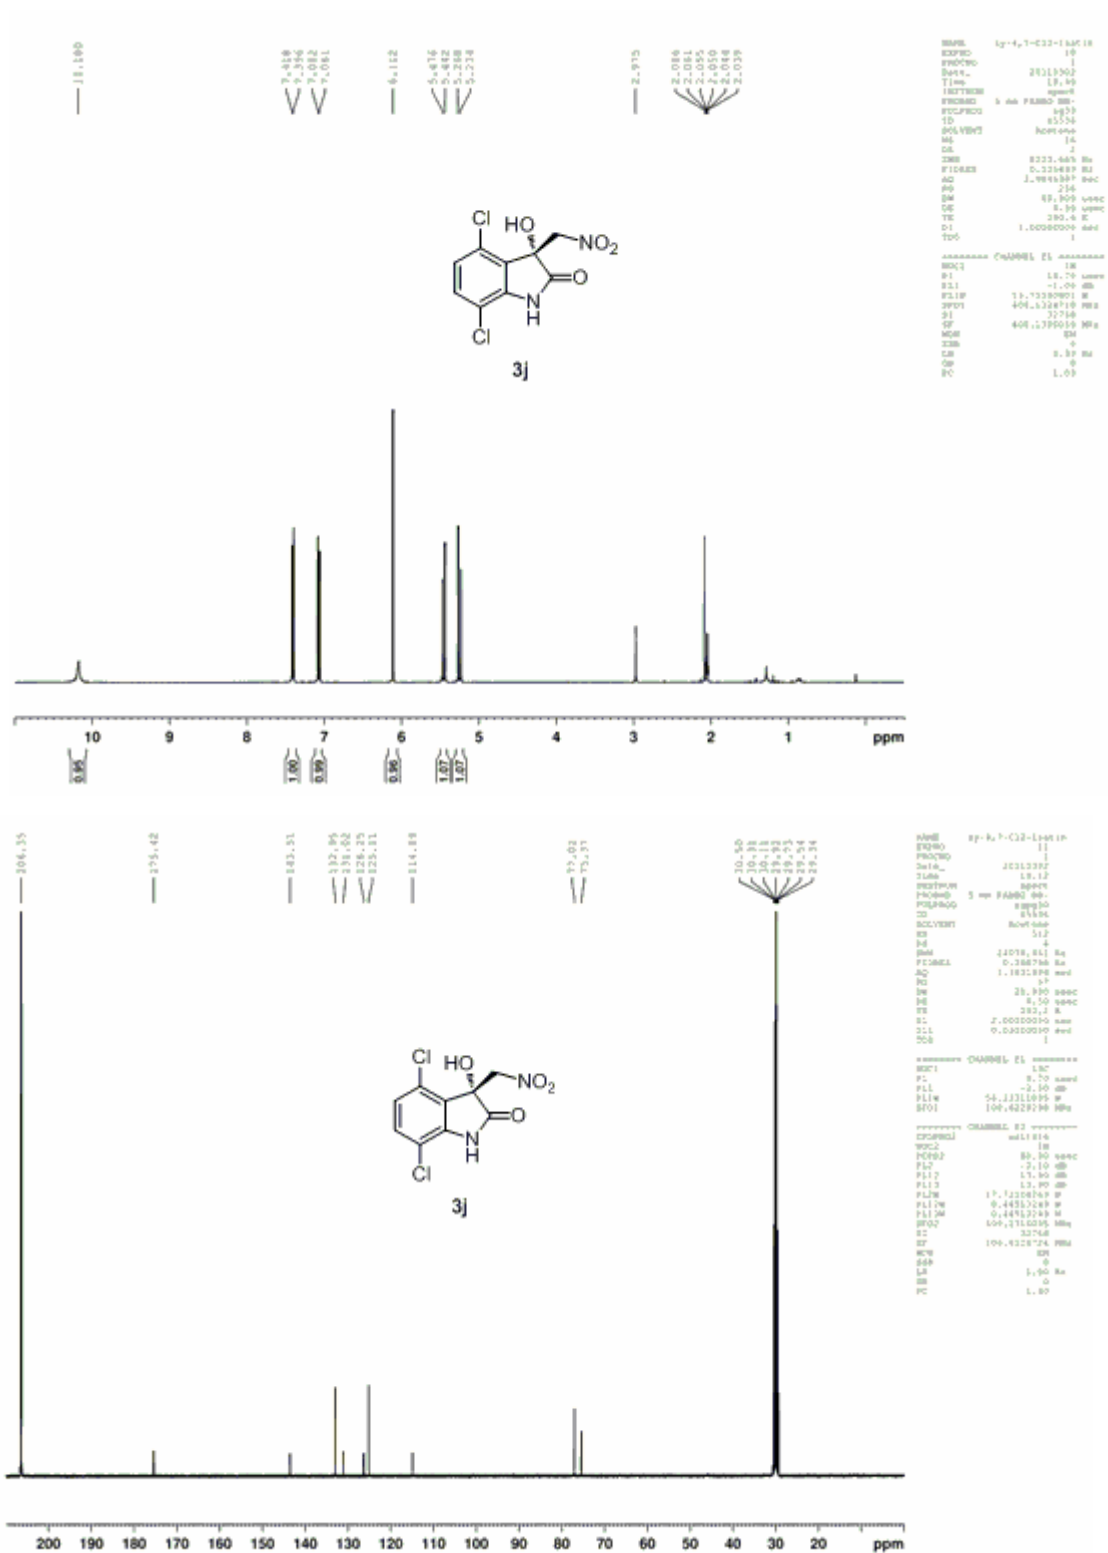

**3j racemic**

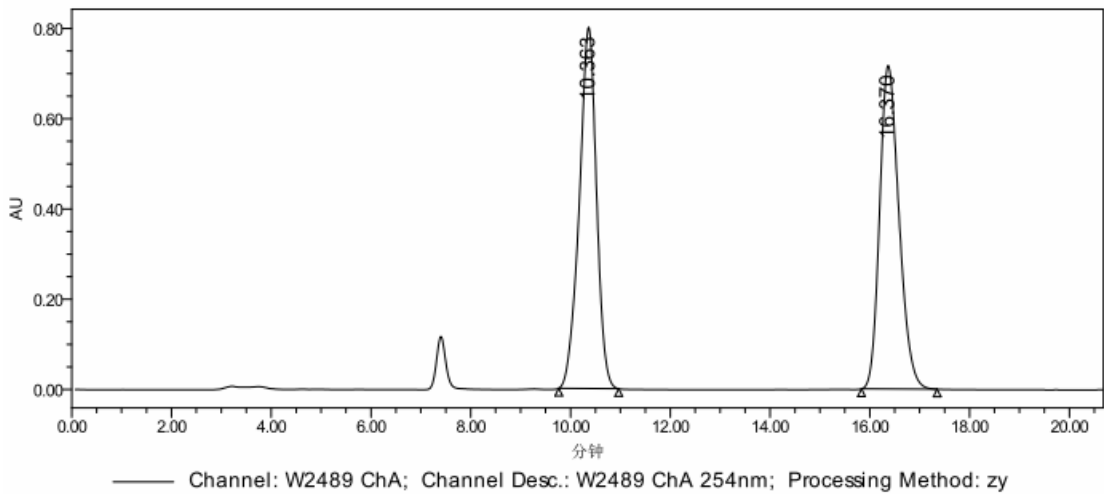

**3j chiral**

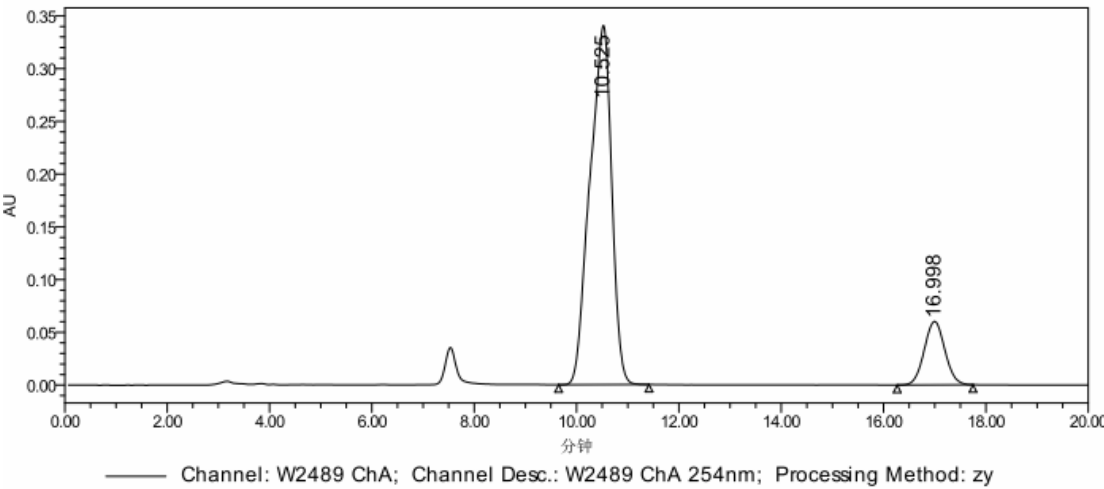

|   | Retention Time | Area     | % Area | Height |
|---|----------------|----------|--------|--------|
| 1 | 10.525         | 10063760 | 85.67  | 340546 |
| 2 | 16.998         | 1682918  | 14.33  | 60050  |

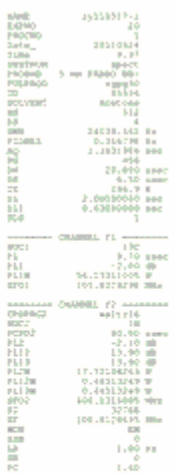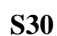

**3k racemic**

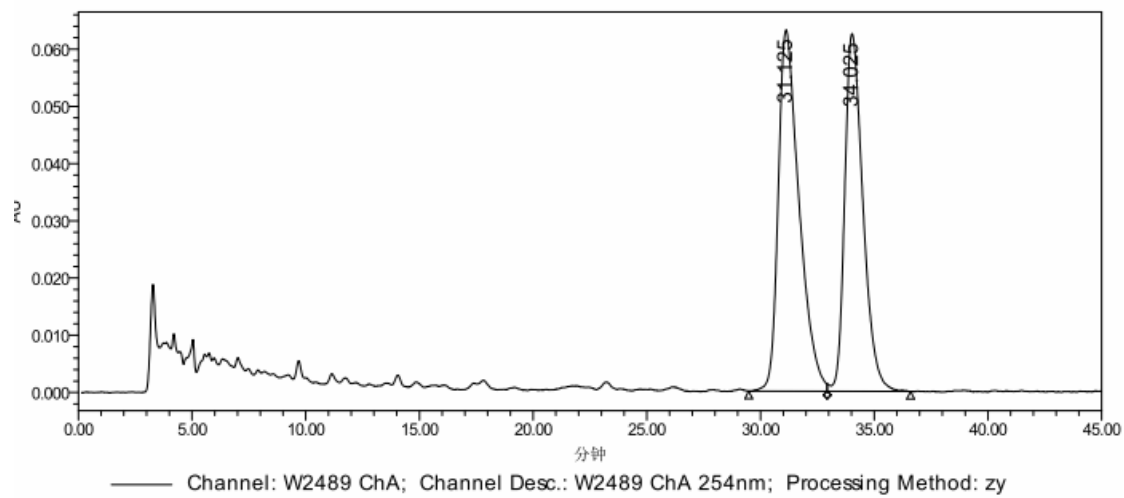

**3k chiral**

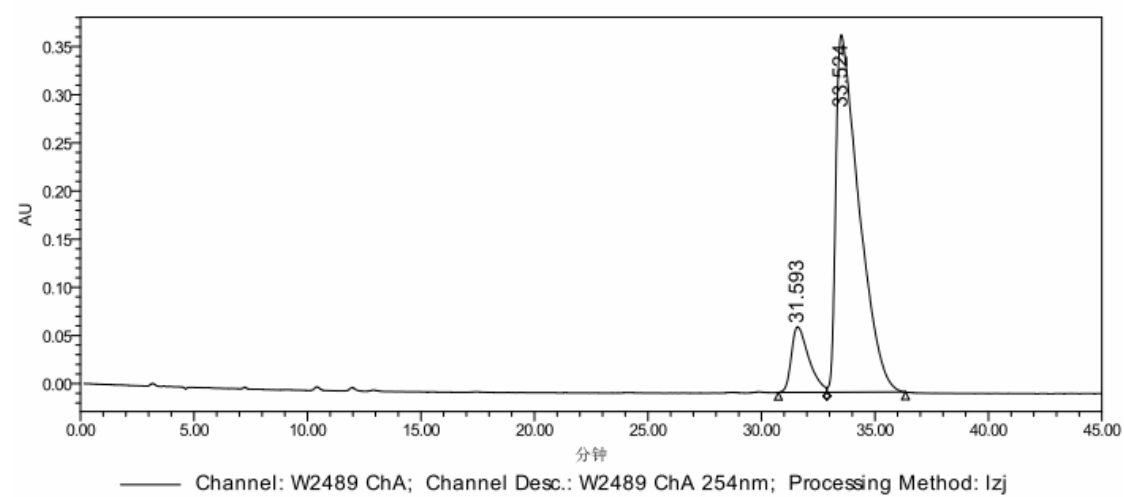

|   | Retention Time | Area     | % Area | Height |
|---|----------------|----------|--------|--------|
| 1 | 31.593         | 3645669  | 12.17  | 67851  |
| 2 | 33.524         | 26305201 | 87.83  | 370864 |

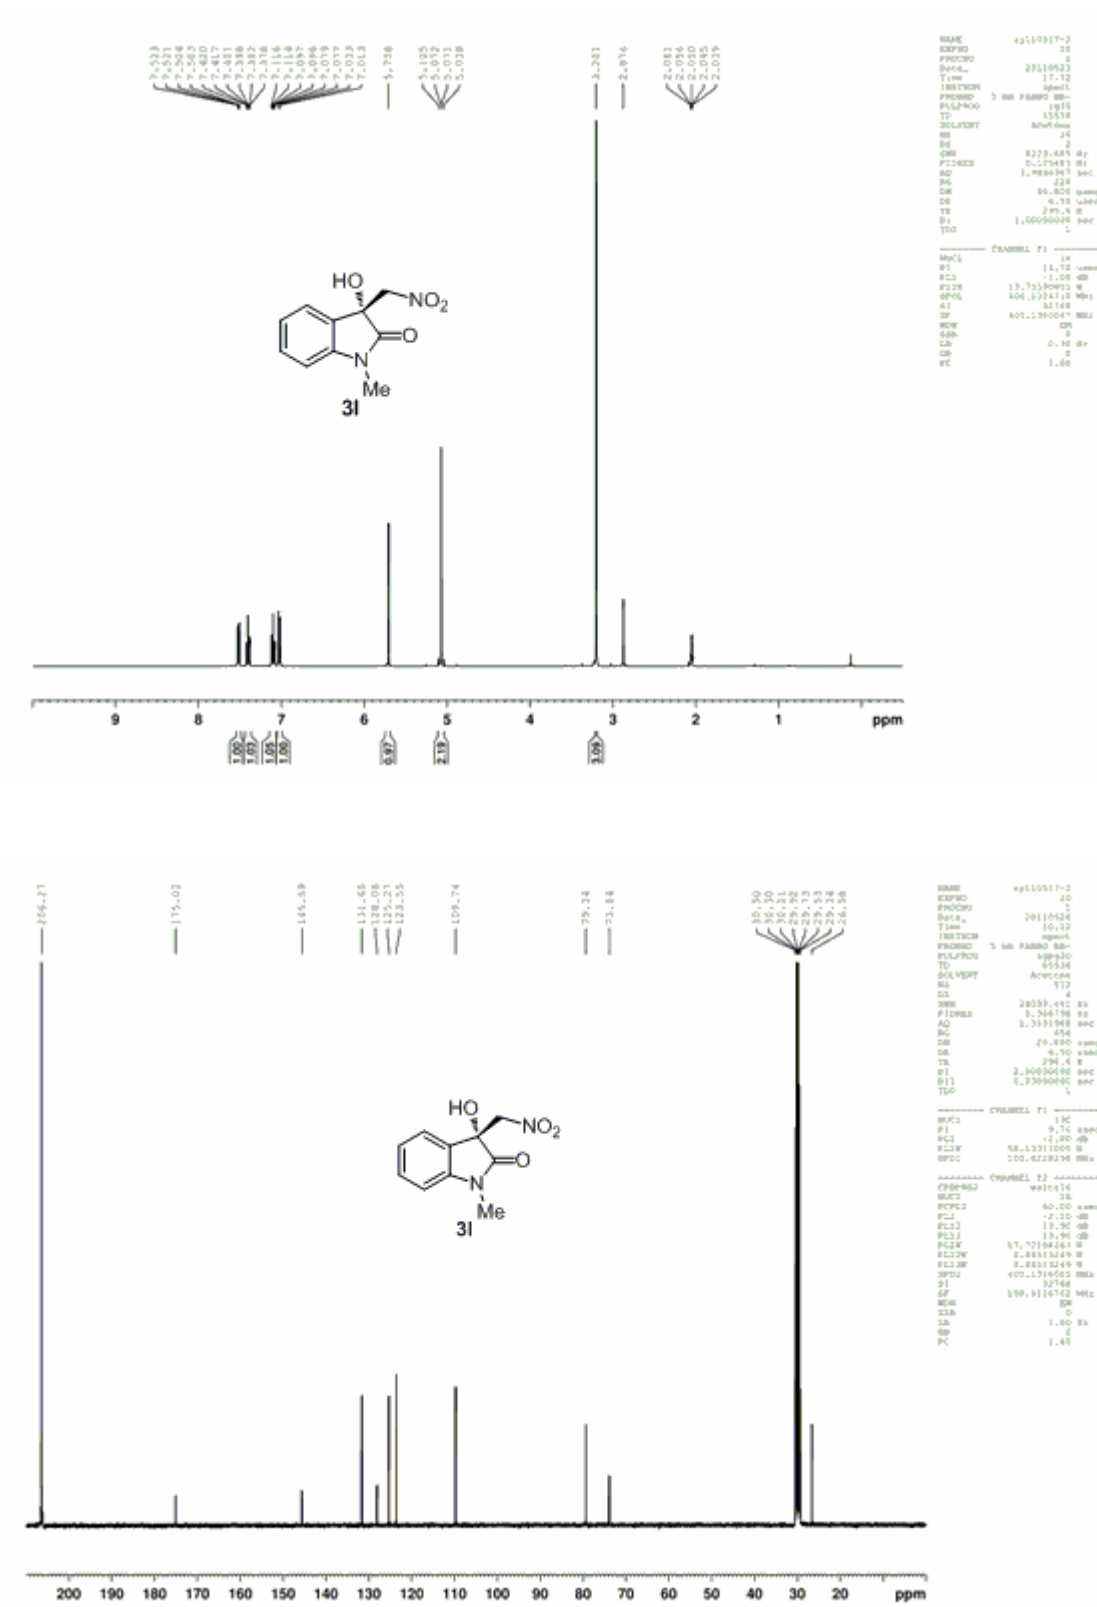

**3l racemic**

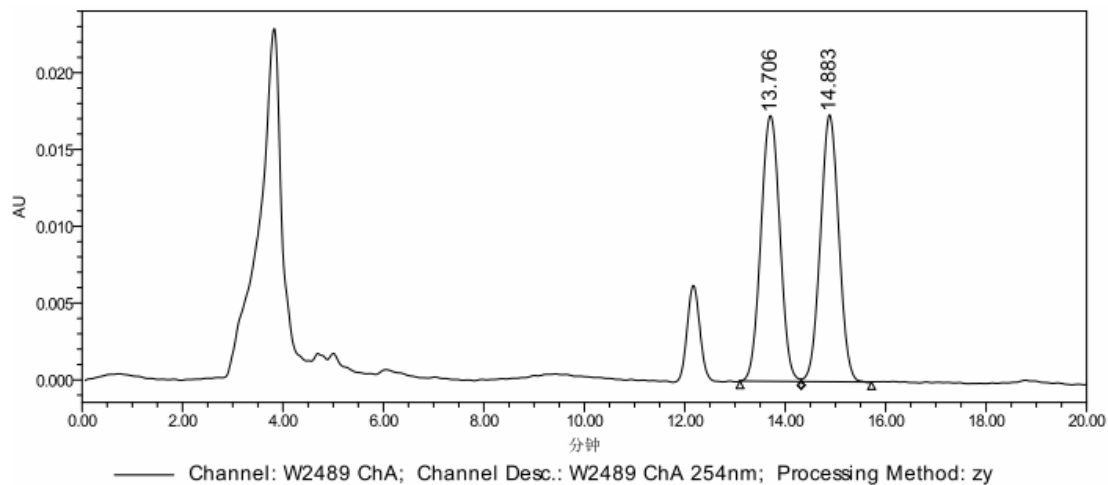

**3l chiral**

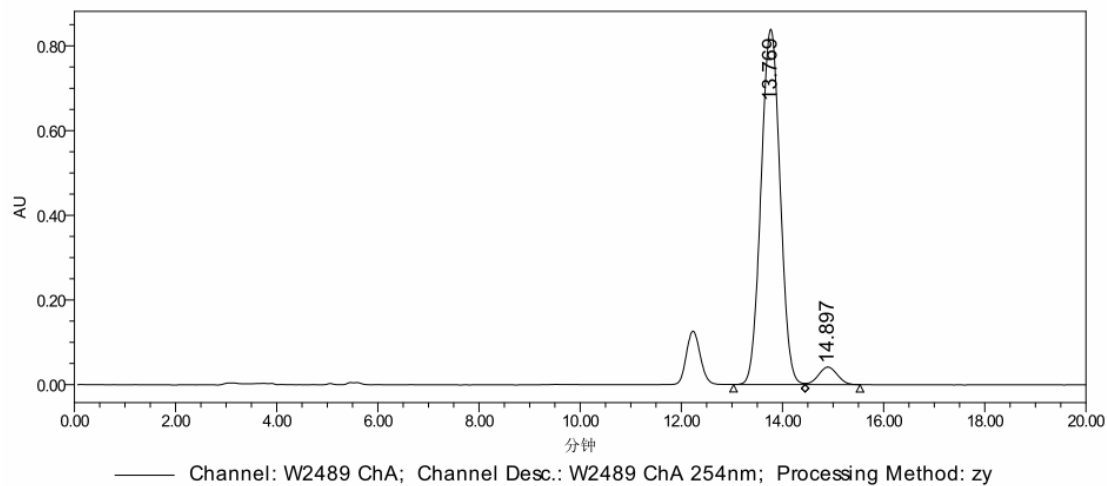

|   | Retention Time | Area     | % Area | Height |
|---|----------------|----------|--------|--------|
| 1 | 13.769         | 22013753 | 95.35  | 839325 |
| 2 | 14.897         | 1072535  | 4.65   | 41580  |

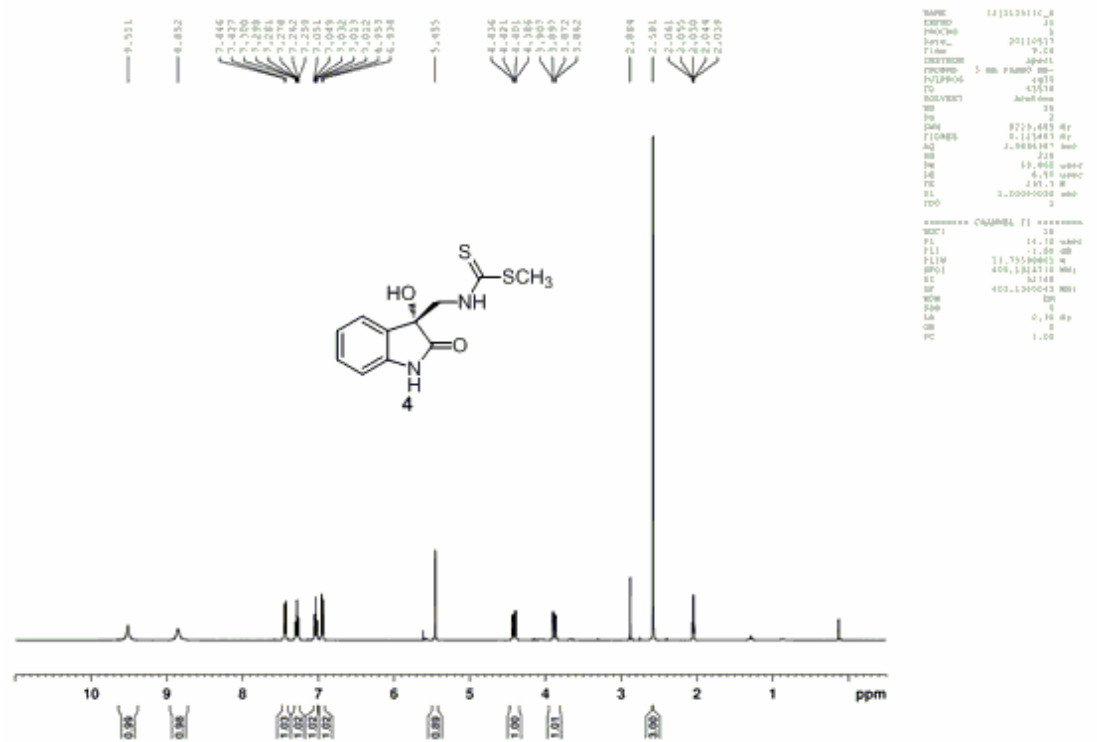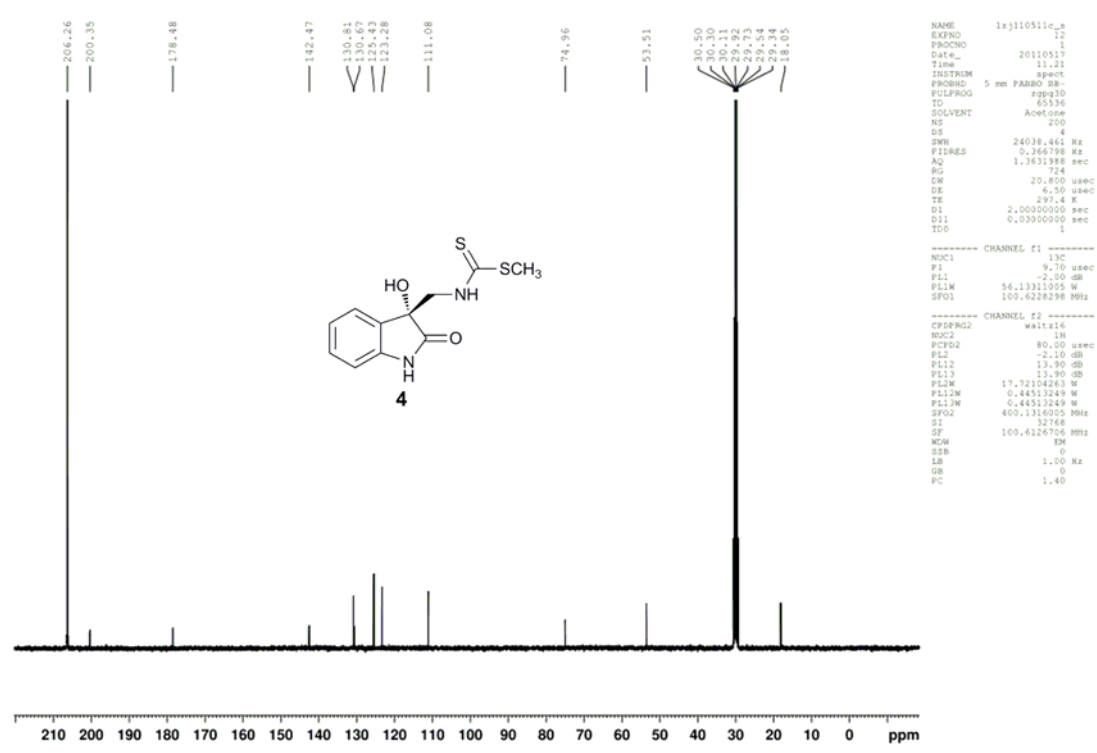

4 racemic

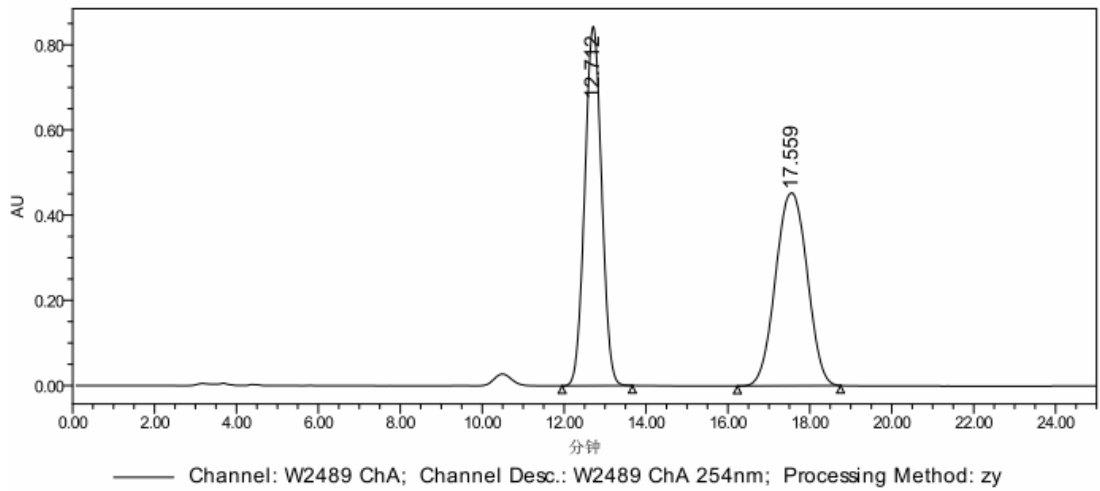

4 chiral

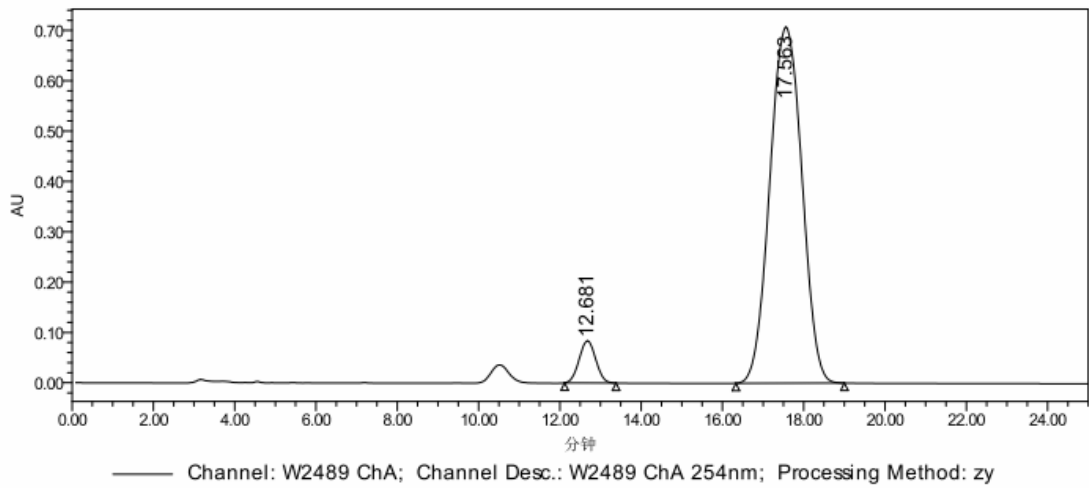

|   | Retention Time | Area     | % Area | Height |
|---|----------------|----------|--------|--------|
| 1 | 12.681         | 2369338  | 5.75   | 83517  |
| 2 | 17.563         | 38814497 | 94.25  | 707543 |
